# Supplementary material for: Clinical features of COVID-19 for integration of COVID-19 into influenza surveillance: A systematic review
Source: PubMed Central journal article supplement (PMC9107308; doi:10.7189/jogh.12.05012), 2022-04-14

1

## Online Supplementary Document

2 Table S1. Summary characteristics of primary studies from reviews which provided data for pooled estimates

| Included review                | Number of primary studies | Age (yrs.) <sup>§</sup>                | Male (%)                   | Countries, n (%)                                                                                                                               | Setting*, n (%)                                     | Number of clinical features <sup>§</sup> |
|--------------------------------|---------------------------|----------------------------------------|----------------------------|------------------------------------------------------------------------------------------------------------------------------------------------|-----------------------------------------------------|------------------------------------------|
| <b>Akin, 2020</b>              | 76                        | <b>All ages</b><br>NP                  | NP                         | China 72 (94.7)<br>USA 8 (10.5)<br>USA & Canada 1 (1.3)<br>Australia 1 (1.3)<br>Europe 10 (13.2)<br>Unknown 1 (1)                              | Hospital 45 (59)<br>Community 4 (5)<br>Both 27 (36) | 4                                        |
| <b>Aziz, 2021</b>              | 51                        | <b>All ages</b><br>Mean 46.7 (SD 10.4) | 46.9                       | China 2 (3.9)<br>USA 5 (9.8)<br>Canada 2 (3.9)<br>Europe 31 (60.8)<br>China & Europe 1 (2.0)<br>Asia 4 (7.8)<br>Turkey 4 (7.8)<br>Iran 2 (3.9) | Hospital 42 (82)<br>Community 9 (18)                | 1                                        |
| <b>Badal, 2020<sup>†</sup></b> | 20                        | <b>Children</b><br>8 (0 -21)           | NP<br>Ratio M: F<br>1:1.34 | China 13 (65.0)<br>USA 3 (15.0)<br>USA & Canada 1 (5.0)<br>Europe 3 (15.0)                                                                     | NP                                                  | 10                                       |
| <b>Christophers, 2020</b>      | 22                        | <b>Children</b><br>5 (0 – 19)          | 54.5                       | China 100 (81.3)<br>USA 2 (1.6)<br>Europe 14 (11.4)<br>Others 7 (5.7)                                                                          | Hospital 22 (100)                                   | 9                                        |
| <b>Chua, 2020</b>              | 3                         | <b>Adults</b><br>NP                    | NP                         | China 1 (33.3)<br>Europe 2 (66.6)                                                                                                              | Hospital 1 (33)<br>Community 1 (33)<br>Both 1 (33)  | 1                                        |

|                                    |     |                                 |      |                                                                                                        |                                                                             |                         |
|------------------------------------|-----|---------------------------------|------|--------------------------------------------------------------------------------------------------------|-----------------------------------------------------------------------------|-------------------------|
| <b>Gaythorpe, 2021</b>             | 14  | <b>Children</b><br>0 - 18       | NP   | China 11 (79)<br>Europe 1 (7)<br>Turkey 1 (7)<br>Others 1 (7)                                          | Hospital 7 (50)<br>Community 2 (14)<br>Unknown 5 (36)                       | 1                       |
| <b>Ghimire, 2021</b>               | 38  | <b>All ages</b><br>NP           | NP   | China 27 (71)<br>USA 5 (13)<br>Europe 3 (8)<br>Asia 2 (5)<br>Mexico 1 (3)                              | Hospital 38 (100)                                                           | 2                       |
| <b>Hasani, 2020</b>                | 14  | <b>All ages</b><br>0 - 94       | NP   | China 14 (100)                                                                                         | Hospital 12 (85.7)<br>Community 1 (7.1)<br>Both 1 (7.1)                     | 10                      |
| <b>Hashan, 2021</b>                | 14  | <b>Adults</b><br>NP             | 44   | China 1 (7.1)<br>USA 5 (35.7)<br>Europe 8 (57.1)                                                       | Hospital 14 (100)                                                           | 16                      |
| <b>Kim, 2021<sup>†</sup></b>       | 80  | <b>All ages</b><br>Mean 68.5    | 57   | China 43 (53.8)<br>USA 10 (12.5)<br>Europe 22 (24.4)<br>Others 5 (6.3)                                 | NP                                                                          | 16                      |
| <b><sup>a</sup>Mutiawati, 2021</b> | 107 | <b>All ages</b><br>NP           | NP   | China 4 (3.7)<br>USA 13 (12.1)<br>UK 3 (2.8)<br>Canada 2 (1.9)<br>Europe 41 (38.3)<br>Others 43 (40.2) | NP                                                                          | 1 (loss of taste/smell) |
| <b><sup>b</sup>Mutiawati, 2021</b> | 78  | <b>All ages</b><br>NP           | NP   | China 47 (60.3)<br>USA 5 (6.4)<br>Europe 14 (17.9)<br>Other 12 (15.4)                                  | Hospital 58 (74.4)<br>Community 8 (10.3)<br>Both 5 (8.6)<br>Unknown 5 (8.6) | 1 (headache)            |
| <b>Syangtan, 2021</b>              | 16  | <b>All ages</b><br>≤ 18: 42.5%, | 54.4 | China 11 (68.8)<br>Japan 2 (12.5)                                                                      | Hospital 7 (43.8)                                                           | 1                       |

|                              |    |                                 |      |                                                           |                                      |    |
|------------------------------|----|---------------------------------|------|-----------------------------------------------------------|--------------------------------------|----|
|                              |    | 19–50: 22.8%<br>≥51: 34.7%      |      | USA 3 (18.8)                                              | Community 5 (31.3)<br>Unknown 4 (25) |    |
| <b>Xie, 2021<sup>†</sup></b> | 90 | <b>Adults</b><br>48.8 (37 – 68) | 53.1 | China 88 (97.8)<br>Australia 1 (1.1)<br>Singapore 1 (1.1) | NP                                   | 10 |

3 § Data are median (Range) or n (%), unless indicated otherwise; NP = not provided, SD= standard deviation; \*community includes outpatient clinics; §only clinical features that were extracted for this review (some reviews  
4 included non-specific or combinations of features which is not included in this number; † reviews which did not provide details of primary studies used for each clinical feature;

Table S2: Detailed findings from individual reviews on clinical features

| Authors                           | Age group | Clinical features   | No. of study | No. of patients | Point estimate | Lower bound of 95% CI | Upper bound of 95% CI |
|-----------------------------------|-----------|---------------------|--------------|-----------------|----------------|-----------------------|-----------------------|
| Akin H, 2020 <sup>5</sup>         | all       | Fever               | 45           | 74543           | 73             | 70                    | 76                    |
| Akin H, 2020 <sup>5</sup>         | all       | Abdominal pain      | 38           | 34713           | 6              | 4                     | 7                     |
| Akin H, 2020 <sup>5</sup>         | all       | Loss of appetite    | 37           | 22743           | 18             | 10                    | 27                    |
| Akin H, 2020 <sup>5</sup>         | all       | Diarrhoea           | 44           | 62892           | 15             | 12                    | 19                    |
| Akin H, 2020 <sup>5</sup>         | all       | Nausea/vomiting     | 44           | 46390           | 10             | 8                     | 12                    |
| Aziz M, 2021 <sup>6</sup>         | all       | Loss of taste/smell | 51           | 11074           | 52             | 42.5                  | 61.6                  |
| Badal S, 2020 <sup>7</sup>        | children  | Asymptomatic        | 20           | 222             | 13             | 11                    | 14                    |
| Badal S, 2020 <sup>7</sup>        | children  | Fever               | 19           | 592             | 55             | 52                    | 58                    |
| Badal S, 2020 <sup>7</sup>        | children  | Cough               | 17           | 467             | 45             | 42                    | 49                    |
| Badal S, 2020 <sup>7</sup>        | children  | Shortness of breath | 11           | 169             | 19             | 16                    | 22                    |
| Badal S, 2020 <sup>7</sup>        | children  | Headache            | 5            | 117             | 67             | 60                    | 74                    |
| Badal S, 2020 <sup>7</sup>        | children  | Rhinorrhoea         | 9            | 38              | 6              | 4                     | 8                     |
| Badal S, 202 <sup>7</sup>         | children  | Nasal congestion    | 8            | 69              | 20             | 16                    | 25                    |
| Badal S, 2020 <sup>7</sup>        | children  | Sore throat         | 11           | 18              | 3              | 2                     | 4                     |
| Badal S, 2020 <sup>7</sup>        | children  | Muscle pain         | 7            | 194             | 35             | 32                    | 40                    |
| Badal S, 2020 <sup>7</sup>        | children  | Fatigue             | 6            | 53              | 9              | 7                     | 11                    |
| Christophers B, 2020 <sup>8</sup> | children  | Asymptomatic        | 22           | 18              | 14.6           | NA                    | NA                    |
| Christophers B, 2020 <sup>8</sup> | children  | Fever               | 22           | 75              | 61.5           | NA                    | NA                    |
| Christophers B, 2020 <sup>8</sup> | children  | Cough               | 22           | 50              | 41             | NA                    | NA                    |
| Christophers B, 2020 <sup>8</sup> | children  | Headache            | 22           | 2               | 1.6            | NA                    | NA                    |
| Christophers B, 2020 <sup>8</sup> | children  | Sore throat         | 22           | 18              | 14.8           | NA                    | NA                    |
| Christophers B, 2020 <sup>8</sup> | children  | Diarrhoea           | 22           | 19              | 15.4           | NA                    | NA                    |
| Christophers B, 2020 <sup>8</sup> | children  | Nausea/vomiting     | 22           | 6               | 4.9            | NA                    | NA                    |
| Christophers B, 2020 <sup>8</sup> | children  | Muscle pain         | 22           | 5               | 4.1            | NA                    | NA                    |
| Christophers B, 2020 <sup>8</sup> | children  | Seizure             | 22           | 2               | 1.6            | NA                    | NA                    |
| Chua TH, 2020 <sup>9</sup>        | adults    | Loss of taste/smell | 3            | 703             | 59.9           |                       |                       |
| Gaythorpe K, 2021 <sup>10</sup>   | children  | Asymptomatic        | 14           |                 | 21.1           | 14                    | 28.1                  |
| Ghimire S, 2021 <sup>11</sup>     | all       | Diarrhoea           | 37           | 8352            | 11.52          | 8.97                  | 14.68                 |
| Ghimire S, 2021 <sup>11</sup>     | all       | Nausea/vomiting     | 26           | 7196            | 7.53           | 5.27                  | 10.65                 |
| Hasani H, 2020 <sup>12</sup>      | all       | Fever               | 14           |                 | 84.3           | 78.6                  | 88.7                  |
| Hasani H, 2020 <sup>12</sup>      | all       | Cough               | 14           |                 | 60.1           | 53.5                  | 66.4                  |
| Hasani H, 2020 <sup>12</sup>      | all       | Expectoration       | 5            |                 | 23.9           | 16.4                  | 33.4                  |
| Hasani H, 2020 <sup>12</sup>      | all       | Shortness of breath | 8            |                 | 17.1           | 9.1                   | 29.8                  |
| Hasani H, 2020 <sup>12</sup>      | all       | Haemoptysis         | 5            |                 | 2.3            | 0.9                   | 5.7                   |
| Hasani H, 2020 <sup>12</sup>      | all       | Headache            | 12           |                 | 9.1            | 7                     | 11.8                  |

|                                 |        |                     |     |        |       |      |      |
|---------------------------------|--------|---------------------|-----|--------|-------|------|------|
| Hasani H, 2020 <sup>12</sup>    | all    | Sore throat         | 5   |        | 13    | 8.5  | 19.3 |
| Hasani H, 2020 <sup>12</sup>    | all    | Diarrhoea           | 11  |        | 6.4   | 4.3  | 9.5  |
| Hasani H, 2020 <sup>12</sup>    | all    | Nausea/vomiting     | 2   |        | 10.9  | 3.8  | 27.5 |
| Hasani H, 2020 <sup>12</sup>    | all    | Fatigue             | 11  |        | 39.4  | 29.1 | 50.8 |
| Hashan MR, 2021 <sup>13</sup>   | adults | Asymptomatic        | 13  | 985    | 31    | 28   | 34   |
| Hashan MR, 2021 <sup>13</sup>   | adults | Fever               | 13  | 1872   | 49    | 47   | 52   |
| Hashan MR, 2021 <sup>13</sup>   | adults | Cough               | 14  | 1876   | 45    | 43   | 47   |
| Hashan MR, 2021 <sup>13</sup>   | adults | Shortness of breath | 10  | 1497   | 29    | 27   | 32   |
| Hashan MR, 2021 <sup>13</sup>   | adults | Dizziness           | 2   | 89     | 5     | 2    | 12   |
| Hashan MR, 2021 <sup>13</sup>   | adults | Headache            | 7   | 1116   | 4     | 3    | 5    |
| Hashan MR, 2021 <sup>13</sup>   | adults | Loss of taste/smell | 2   | 313    | 1     | 0    | 1    |
| Hashan MR, 2021 <sup>13</sup>   | adults | Rhinorrhoea         | 5   | 1331   | 5     | 4    | 6    |
| Hashan MR, 2021 <sup>13</sup>   | adults | Sore throat         | 6   | 1128   | 5     | 4    | 7    |
| Hashan MR, 2021 <sup>13</sup>   | adults | Loss of appetite    | 9   | 1712   | 14    | 13   | 16   |
| Hashan MR, 2021 <sup>13</sup>   | adults | Diarrhoea           | 7   | 647    | 12    | 10   | 15   |
| Hashan MR, 2021 <sup>13</sup>   | adults | Nausea/vomiting     | 6   | 528    | 6     | 4    | 8    |
| Hashan MR, 2021 <sup>13</sup>   | adults | Muscle pain         | 5   | 256    | 3     | 1    | 6    |
| Hashan MR, 2021 <sup>13</sup>   | adults | Fatigue             | 5   | 1162   | 7     | 6    | 9    |
| Hashan MR, 2021 <sup>13</sup>   | adults | Hypoxia             | 5   | 373    | 33    | 29   | 38   |
| Hashan MR, 2021 <sup>13</sup>   | adults | Rash                | 1   | 103    | 1     | 0    | 7    |
| Kim H, 2021 <sup>14</sup>       | all    | Fever               | 32  | NA     | 79    | 70   | 86   |
| Kim H, 2021 <sup>14</sup>       | all    | Cough               | 31  | NA     | 65    | 60   | 70   |
| Kim H, 2021 <sup>14</sup>       | all    | Expectoration       | 16  | NA     | 27    | 20   | 35   |
| Kim H, 2021 <sup>14</sup>       | all    | Shortness of breath | 28  | NA     | 43    | 34   | 52   |
| Kim H, 2021 <sup>14</sup>       | all    | Dizziness           | 5   | NA     | 14    | 4    | 28   |
| Kim H, 2021 <sup>14</sup>       | all    | Headache            | 19  | NA     | 12    | 8    | 16   |
| Kim H, 2021 <sup>14</sup>       | all    | Rhinorrhoea         | 5   | NA     | 8     | 4    | 12   |
| Kim H, 2021 <sup>14</sup>       | all    | Sore throat         | 15  | NA     | 9     | 6    | 12   |
| Kim H, 2021 <sup>14</sup>       | all    | Abdominal pain      | 5   | NA     | 4     | 1    | 9    |
| Kim H, 2021 <sup>14</sup>       | all    | Loss of appetite    | 8   | NA     | 58    | 43   | 72   |
| Kim H, 2021 <sup>14</sup>       | all    | Diarrhoea           | 25  | NA     | 14    | 10   | 19   |
| Kim H, 2021 <sup>14</sup>       | all    | Nausea/vomiting     | 12  | NA     | 12    | 7    | 17   |
| Kim H, 2021 <sup>14</sup>       | all    | Nausea/vomiting     | 7   | NA     | 8     | 2    | 18   |
| Kim H, 2021 <sup>14</sup>       | all    | Muscle pain         | 22  | NA     | 22    | 17   | 27   |
| Kim H, 2021 <sup>14</sup>       | all    | Fatigue             | 17  | NA     | 44    | 32   | 55   |
| Kim H, 2021 <sup>14</sup>       | all    | Chest tightness     | 10  | NA     | 21    | 11   | 33   |
| Mutiawati E, 2021 <sup>15</sup> | all    | Loss of taste/smell | 107 | 32142  | 38.2  | 36.5 | 47.2 |
| Mutiawati E, 2021 <sup>16</sup> | all    | Headache            | 78  | 104751 | 25.26 | NA   | NA   |
| Syangtan G, 2021 <sup>27</sup>  | all    | Asymptomatic        | 16  | 2788   | 48.2  | 30   | 60   |
| Xie J, 2021 <sup>24</sup>       | adults | Fever               | 65  | 10881  | 78.4  | 74.5 | 82.3 |
| Xie J, 2021 <sup>24</sup>       | adults | Chills/Shivering    | 14  | 3841   | 13.7  | 8.1  | 19.2 |
| Xie J, 2021 <sup>24</sup>       | adults | Chest pain          | 17  | 3197   | 3.9   | 2.4  | 5.4  |
| Xie J, 2021 <sup>24</sup>       | adults | Cough               | 62  | 10571  | 58.5  | 51.4 | 65.6 |

|                           |        |                     |    |      |      |      |      |
|---------------------------|--------|---------------------|----|------|------|------|------|
| Xie J, 2021 <sup>24</sup> | adults | Expectoration       | 35 | 6964 | 22.7 | 18.2 | 27.2 |
| Xie J, 2021 <sup>24</sup> | adults | Shortness of breath | 19 | 5964 | 18.5 | 12.9 | 24.2 |
| Xie J, 2021 <sup>24</sup> | adults | Haemoptysis         | 6  | 2039 | 1.7  | 0.7  | 2.8  |
| Xie J, 2021 <sup>24</sup> | adults | Dizziness           | 10 | 1831 | 4.2  | 2.5  | 5.9  |
| Xie J, 2021 <sup>24</sup> | adults | Headache            | 35 | 7379 | 9.3  | 7.6  | 11   |
| Xie J, 2021 <sup>24</sup> | adults | Fatigue             | 45 | 8938 | 26.4 | 21.4 | 31.4 |

\*NA: Not available

Table S3: Quality assessment

| Author (year)                 | 1. Is the review question clearly and explicitly stated? | 2. Were the inclusion criteria appropriate for the review question? | 3. Was the search strategy appropriate? | 4. Were the sources and resources used to search for studies adequate? | 5. Were the criteria for appraising studies appropriate? | 6. Was critical appraisal conducted by two or more reviewers independently? | 7. Were there methods to minimize errors in data extraction? | 8. Were the methods used to combine studies appropriate? | 9. Was the likelihood of publication bias assessed? | 10. Were recommendations for policy and/or practice supported by the reported data? | 11. Were the specific directives for new research appropriate? | Total (yes) |
|-------------------------------|----------------------------------------------------------|---------------------------------------------------------------------|-----------------------------------------|------------------------------------------------------------------------|----------------------------------------------------------|-----------------------------------------------------------------------------|--------------------------------------------------------------|----------------------------------------------------------|-----------------------------------------------------|-------------------------------------------------------------------------------------|----------------------------------------------------------------|-------------|
| Akin,2020                     | Yes                                                      | Yes                                                                 | Yes                                     | Yes                                                                    | No                                                       | No                                                                          | No                                                           | Yes                                                      | No                                                  | Yes                                                                                 | Yes                                                            | 7           |
| Aziz M 2021                   | Yes                                                      | Yes                                                                 | No                                      | Yes                                                                    | Yes                                                      | No                                                                          | No                                                           | Yes                                                      | Yes                                                 | No                                                                                  | Yes                                                            | 7           |
| Badal S 2020                  | Yes                                                      | Yes                                                                 | Yes                                     | Yes                                                                    | Yes                                                      | Yes                                                                         | Yes                                                          | Yes                                                      | Yes                                                 | Yes                                                                                 | Yes                                                            | 11          |
| Christophers B 2020           | Yes                                                      | Yes                                                                 | No                                      | Yes                                                                    | Yes                                                      | Yes                                                                         | Yes                                                          | No                                                       | No                                                  | Yes                                                                                 | No                                                             | 7           |
| Chua TH 2020                  | Yes                                                      | Yes                                                                 | No                                      | No                                                                     | No                                                       | No                                                                          | No                                                           | Yes                                                      | No                                                  | No                                                                                  | No                                                             | 3           |
| Gaythorpe 2021                | Yes                                                      | Yes                                                                 | No                                      | No                                                                     | Yes                                                      | Yes                                                                         | No                                                           | Yes                                                      | Yes                                                 | No                                                                                  | No                                                             | 6           |
| Ghimire S 2021                | Yes                                                      | Yes                                                                 | Yes                                     | No                                                                     | No                                                       | Yes                                                                         | Yes                                                          | Yes                                                      | Yes                                                 | No                                                                                  | No                                                             | 7           |
| Hasani H 2020                 | Yes                                                      | Yes                                                                 | Yes                                     | Yes                                                                    | Yes                                                      | No                                                                          | Yes                                                          | Yes                                                      | Yes                                                 | No                                                                                  | Yes                                                            | 9           |
| Hashan MR 2021                | Yes                                                      | Yes                                                                 | Yes                                     | Yes                                                                    | Yes                                                      | Yes                                                                         | Yes                                                          | Yes                                                      | Yes                                                 | Yes                                                                                 | Yes                                                            | 11          |
| Kim H 2021                    | Yes                                                      | Yes                                                                 | Yes                                     | Yes                                                                    | Yes                                                      | Yes                                                                         | No                                                           | Yes                                                      | Yes                                                 | No                                                                                  | Yes                                                            | 9           |
| <sup>a</sup> Mutiawati E 2021 | Yes                                                      | Yes                                                                 | Yes                                     | Yes                                                                    | Yes                                                      | No                                                                          | No                                                           | Yes                                                      | Yes                                                 | No                                                                                  | No                                                             | 7           |
| <sup>b</sup> Mutiawati E 2021 | Yes                                                      | Yes                                                                 | Yes                                     | Yes                                                                    | Yes                                                      | Yes                                                                         | Yes                                                          | Yes                                                      | Yes                                                 | Yes                                                                                 | Yes                                                            | 11          |
| Syangtan G 2021               | Yes                                                      | Yes                                                                 | Yes                                     | Yes                                                                    | Yes                                                      | Yes                                                                         | No                                                           | Yes                                                      | Yes                                                 | Yes                                                                                 | NA                                                             | 9           |
| Xie J 2021                    | Yes                                                      | Yes                                                                 | No                                      | Yes                                                                    | Unclear                                                  | Yes                                                                         | Yes                                                          | Yes                                                      | Yes                                                 | No                                                                                  | Unclear                                                        | 7           |







Table S5 List of primary studies for included reviews

| Included reviews | Primary studies                                             | Title                                                                                                                                                                                    |
|------------------|-------------------------------------------------------------|------------------------------------------------------------------------------------------------------------------------------------------------------------------------------------------|
| Akin H 2020      | Fanelli V                                                   | Acute kidney injury in SARS-CoV-2 infected patients.                                                                                                                                     |
| Akin H 2020      | Docherty AB                                                 | Features of 16, 749 hospitalised UK patients with COVID-19 using the ISARIC WHO Clinical Characterization Protocol.                                                                      |
| Akin H 2020      | CDC USA (A Children)                                        | Coronavirus disease 2019 in children                                                                                                                                                     |
| Akin H 2020      | CDC USA (B Health care professionals)                       | Characteristics of Health Care Personnel with COVID-19                                                                                                                                   |
| Akin H 2020      | Borobia A                                                   | A Cohort of Patients with COVID-19 in a Major Teaching Hospital in Europe                                                                                                                |
| Akin H 2020      | Elmunzer BJ                                                 | Digestive Manifestations in Patients Hospitalized with COVID-19                                                                                                                          |
| Akin H 2020      | Guan WJ (A)                                                 | Comorbidity and its impact on 1590 patients with COVID-19 in China: a nationwide analysis                                                                                                |
| Akin H 2020      | Luo S                                                       | Don't Overlook Digestive Symptoms in Patients With 2019 Novel Coronavirus Disease (COVID-19).                                                                                            |
| Akin H 2020      | Guan WJ (B)                                                 | Clinical Characteristics of Coronavirus Disease 2019 in China                                                                                                                            |
| Akin H 2020      | Hajifathalian K                                             | Gastrointestinal and Hepatic Manifestations of 2019 Novel Coronavirus Disease in a Large Cohort of Infected Patients From New York: Clinical Implications                                |
| Akin H 2020      | Gil-Rodrigo A                                               | Analysis of clinical characteristics and outcomes in patients with COVID-19 based on a series of 1000 patients treated in Spanish emergency departments                                  |
| Akin H 2020      | Kuang Y                                                     | Epidemiological and clinical characteristics of 944 cases of 2019 novel Coronavirus infection of non-COVID-19 exporting city, Zhejiang, China.                                           |
| Akin H 2020      | Jin X                                                       | Epidemiological, clinical and virological characteristics of 74 cases of coronavirus-infected disease 2019 (COVID-19) with gastrointestinal symptoms.                                    |
| Akin H 2020      | COVID-19 National Incident Room Surveillance Team Australia | Epidemiology Report 13 (Reporting week to 23: 59 AEST 26 April 2020). Commun. Dis. Intell. (2018) 2020, 44, 1–27.                                                                        |
| Akin H 2020      | Livanos AE                                                  | Gastrointestinal involvement attenuates COVID-19 severity and mortality.                                                                                                                 |
| Akin H 2020      | Lui W                                                       | Analysis of 2019 Novel Coronavirus Infection and Clinical Characteristics of Outpatients: An Epidemiological Study from the Fever Clinic in Wuhan, China                                 |
| Akin H 2020      | Shu L                                                       | Clinical Characteristics of 545 Cases Confirmed COVID-19 in Wuhan Stadium Cabin Hospital.                                                                                                |
| Akin H 2020      | Han Y                                                       | Epidemiological Assessment of Imported Coronavirus Disease 2019 (COVID-19) Cases in the Most Affected City Outside of Hubei Province, Wenzhou, China.                                    |
| Akin H 2020      | Wen Y                                                       | Epidemiological and clinical characteristics of COVID-19 in Shenzhen, the largest migrant city of China.                                                                                 |
| Akin H 2020      | Leichen JR                                                  | Olfactory and gustatory dysfunctions as a clinical presentation of mild-to-moderate forms of the coronavirus disease (COVID-19): A multicenter European study.                           |
| Akin H 2020      | Bannaga S                                                   | C-reactive protein and albumin association with mortality of hospitalised SARS-CoV-2 patients: A tertiary hospital experience.                                                           |
| Akin H 2020      | Redd WD                                                     | Prevalence and characteristics of gastrointestinal symptoms in patients with severe acute respiratory syndrome coronavirus 2 infection in the United States: A multicenter cohort study. |

| Included reviews | Primary studies  | Title                                                                                                                                                                                                                 |
|------------------|------------------|-----------------------------------------------------------------------------------------------------------------------------------------------------------------------------------------------------------------------|
| Akin H 2020      | Fang D           | Manifestations of digestive system in hospitalized patients with novel coronavirus pneumonia in Wuhan, China: A single-center, descriptive study.                                                                     |
| Akin H 2020      | CDC COVID-19 USA | Coronavirus Disease 2019 in Children—United States, 12 February–2 April 2020.                                                                                                                                         |
| Akin H 2020      | Chen X           | Epidemiological and clinical features of 291 cases with coronavirus disease 2019 in areas adjacent to Hubei, China: A double-center observational study.                                                              |
| Akin H 2020      | Nobel YR         | Gastrointestinal Symptoms and COVID-19: Case-Control Study from the United States.                                                                                                                                    |
| Akin H 2020      | Chen T           | Clinical characteristics of 113 deceased patients with coronavirus disease 2019: Retrospective study.                                                                                                                 |
| Akin H 2020      | Qi D             | Epidemiological and clinical features of 2019-nCoV acute respiratory disease cases in Chongqing municipality, China: A retrospective, descriptive, multiple-center study.                                             |
| Akin H 2020      | Zhou Z           | Effect of Gastrointestinal Symptoms in Patients With COVID-19.                                                                                                                                                        |
| Akin H 2020      | Chen J           | Clinical progression of patients with COVID-19 in Shanghai, China.                                                                                                                                                    |
| Akin H 2020      | Lui L            | A preliminary study on serological assay for severe acute respiratory syndrome coronavirus 2 (SARS-CoV-2) in 238 admitted hospital patients.                                                                          |
| Akin H 2020      | Zhang G          | Clinical features and short-term outcomes of 221 patients with COVID-19 in Wuhan, China.                                                                                                                              |
| Akin H 2020      | Chen C           | Favipiravir versus arbidol for COVID-19: A randomized clinical trial.                                                                                                                                                 |
| Akin H 2020      | Xu Z             | Cannot find this paper in references there is a Xu YH a Xu XW a Xu W a Xu X ?? Typo for one of these                                                                                                                  |
| Akin H 2020      | Zhang G          | Clinical features and short-term outcomes of 221 patients with COVID-19 in Wuhan, China.                                                                                                                              |
| Akin H 2020      | Zhang Y          | Gastrointestinal tract symptoms in coronavirus disease 2019: Analysis of clinical symptoms in adult patients.                                                                                                         |
| Akin H 2020      | Pan L            | Clinical characteristics of COVID-19 patients with digestive symptoms in Hubei, China: A descriptive, cross-sectional, multicenter study.                                                                             |
| Akin H 2020      | Wei L            | Clinical Findings of 100 Mild Cases of COVID-19 in Wuhan: A Descriptive Study.                                                                                                                                        |
| Akin H 2020      | Fu L             | Influence factors of death risk among COVID-19 patients in Wuhan, China: A hospital-based case-cohort study                                                                                                           |
| Akin H 2020      | Xiaong X         | Are COVID-19 infected children with gastrointestinal symptoms different from those without symptoms? A comparative study of the clinical characteristics and epidemiological trend of 244 pediatric cases from Wuhan. |
| Akin H 2020      | Huang M          | Epidemiological and Clinical Features of 197 Patients Infected with 2019 Novel Coronavirus in Chongqing, China: A Single Center Descriptive Study.                                                                    |
| Akin H 2020      | Yan Y            | Clinical characteristics and outcomes of patients with severe covid-19 with diabetes.                                                                                                                                 |
| Akin H 2020      | Zhou F           | Clinical course and risk factors for mortality of adult inpatients with COVID-19 in Wuhan, China: A retrospective cohort study.                                                                                       |
| Akin H 2020      | Gong J           | A tool to early predict severe 2019-novel coronavirus pneumonia (COVID-19): A multicenter study using the risk nomogram in Wuhan and Guangdong, China.                                                                |
| Akin H 2020      | Garg S           | Risk Factors for COVID-19-associated hospitalization: COVID-19-Associated Hospitalization Surveillance Network and Behavioral Risk Factor Surveillance System                                                         |
| Akin H 2020      | Chen D           | Hypokalemia and Clinical Implications in Patients with Coronavirus Disease 2019 (COVID-19)                                                                                                                            |
| Akin H 2020      | Lu X             | SARS-CoV-2 infection in children.                                                                                                                                                                                     |

| Included reviews | Primary studies | Title                                                                                                                                                             |
|------------------|-----------------|-------------------------------------------------------------------------------------------------------------------------------------------------------------------|
| Akin H 2020      | Garazzino S     | Multicentre Italian study of SARS-CoV-2 infection in children and adolescents, preliminary data as at 10 April 2020.                                              |
| Akin H 2020      | Zheng F         | Clinical characteristics of 161 cases of corona virus disease 2019 (COVID-19) in Changsha.                                                                        |
| Akin H 2020      | Mo P            | Clinical characteristics of refractory COVID-19 pneumonia in Wuhan, China.                                                                                        |
| Akin H 2020      | Yang W          | Clinical characteristics and imaging manifestations of the 2019 novel coronavirus disease (COVID-19): A multi-center study in Wenzhou city, Zhejiang, China.      |
| Akin H 2020      | Fan Z           | Clinical features of COVID-19-related liver damage.                                                                                                               |
| Akin H 2020      | Chen Q          | Clinical characteristics of 145 patients with corona virus disease 2019 (COVID-19) in Taizhou, Zhejiang, China.                                                   |
| Akin H 2020      | Zhang JJ        | Clinical characteristics of 140 patients infected with SARS-CoV-2 in Wuhan, China.                                                                                |
| Akin H 2020      | Wang D          | Clinical characteristics of 138 hospitalized patients with 2019 novel coronavirus–infected pneumonia in Wuhan, China.                                             |
| Akin H 2020      | Giacomet V      | Gastrointestinal Symptoms in Severe COVID-19 Children.                                                                                                            |
| Akin H 2020      | Cholankeni G    | High Prevalence of Concurrent Gastrointestinal Manifestations in Patients With Severe Acute Respiratory Syndrome Coronavirus 2: Early Experience From California. |
| Akin H 2020      | Klopfenstein T  | Diarrhea: An under estimated symptom in Corona virus disease 2019.                                                                                                |
| Akin H 2020      | Lin L           | Gastrointestinal symptoms of 95 cases with SARS-CoV-2 infection.                                                                                                  |
| Akin H 2020      | Kluytmans M     | SARS-CoV-2 infection in 86 healthcare workers in two Dutch hospitals in March 2020.                                                                               |
| Akin H 2020      | Wei X-S         | Diarrhea is associated with prolonged symptoms and viral carriage in COVID-19.                                                                                    |
| Akin H 2020      | Cheung KS       | Gastrointestinal manifestations of SARS-CoV-2 infection and virus load in fecal samples from the Hong Kong cohort and systematic review and meta-analysis.        |
| Akin H 2020      | Wu WS           | Investigation and analysis on characteristics of a cluster of COVID-19 associated with exposure in a department store in Tianjin.                                 |
| Akin H 2020      | Feng Z          | Early prediction of disease progression in 2019 novel coronavirus pneumonia patients outside Wuhan with CT and clinical characteristics.                          |
| Akin H 2020      | Wan S           | Relationships among lymphocyte subsets, cytokines, and the pulmonary inflammation index in coronavirus (COVID-19) infected patients.                              |
| Akin H 2020      | Ai J            | The cross-sectional study of hospitalized corona virus disease 2019 patients in Xiangyang, Hubei province.                                                        |
| Akin H 2020      | Chen N          | Epidemiological and clinical characteristics of 99 cases of 2019 novel corona virus pneumonia in Wuhan, China: A descriptive study.                               |
| Akin H 2020      | Qian GQ         | Epidemiologic and Clinical Characteristics of 91 Hospitalized Patients with COVID-19 in Zhejiang, China: A retrospective, multi-centre case series.               |
| Akin H 2020      | Zhao XY         | Clinical characteristics of patients with 2019 corona virus disease in a non-Wuhan area of Hubei Province, China: A retrospective study.                          |
| Akin H 2020      | Shi H           | Radiological findings from 81 patients with COVID-19 pneumonia in Wuhan, China: A descriptive study.                                                              |
| Akin H 2020      | Fang X          | Clinical characteristics and treatment strategies of 79 patients with COVID-19.                                                                                   |
| Akin H 2020      | Zhao Z          | Clinical and laboratory profiles of 75 hospitalized patients with novel corona virus disease 2019 in Hefei, China.                                                |
| Akin H 2020      | Song F          | Emerging 2019 novel coronavirus (2019-nCoV) pneumonia.                                                                                                            |
| Akin H 2020      | Meng J          | Renin-angiotensin system inhibitors improve the clinical outcomes of COVID-19 patients with hypertension.                                                         |
| Akin H 2020      | Hu Z            | Clinical characteristics of 24 asymptomatic infections with COVID-19 screened among close contacts in Nanjing, China.                                             |

| Included reviews | Primary studies       | Title                                                                                                                                                                     |
|------------------|-----------------------|---------------------------------------------------------------------------------------------------------------------------------------------------------------------------|
| Akin H 2020      | Liang D               | Prevalence and clinical features of 2019 novel coronavirus disease (COVID-19) in the Fever Clinic of a teaching hospital in Beijing: a single-center, retrospective study |
| Aziz M 2021      | Abalo-Lojo            | Taste and smell dysfunction in COVID-19 patients                                                                                                                          |
| Aziz M 2021      | Aggrawal              | Clinical features, laboratory characteristics, and outcomes of patients hospitalized with coronavirus disease 2019 (COVID-19): Early report from the United States        |
| Aziz M 2021      | Altin F               | Olfactory and gustatory abnormalities in COVID-19 cases                                                                                                                   |
| Aziz M 2021      | Beltrán-Corbellini Á  | Acute-onset smell and taste disorders in the context of COVID-19: a pilot multicentre polymerase chain reaction based case-control study                                  |
| Aziz M 2021      | Brandstetter          | Symptoms and immunoglobulin development in hospital staff exposed to a SARS-CoV-2 outbreak                                                                                |
| Aziz M 2021      | Carignan A            | Anosmia and dysgeusia associated with SARS-CoV-2 infection: an age-matched case-control study                                                                             |
| Aziz M 2021      | Chiesa-Estomba (1)    | Olfactory and gustatory dysfunctions in COVID-19 first reports of Latin-American ethnic patients                                                                          |
| Aziz M 2021      | Chiesa-Estomba (2)    | Patterns of smell recovery in 751 patients affected by the COVID-19 outbreak                                                                                              |
| Aziz M 2021      | D'Ascanio L           | Olfactory dysfunction in COVID-19 patients: prevalence and prognosis for recovering sense of smell                                                                        |
| Aziz M 2021      | Dawson P              | Loss of taste and smell as distinguishing symptoms of COVID-19                                                                                                            |
| Aziz M 2021      | Dell'Era V            | Smell and taste disorders during COVID-19 outbreak: cross-sectional study on 355 patients                                                                                 |
| Aziz M 2021      | Giacomelli            | Self-reported olfactory and taste disorders in patients with severe acute respiratory coronavirus 2 infection: a cross-sectional study                                    |
| Aziz M 2021      | Gorzowski V           | Evolution of olfactory disorders in COVID-19 patients                                                                                                                     |
| Aziz M 2021      | Guner                 | COVID-19 experience of the major pandemic response center in the capital: results of the pandemic's first month in Turkey                                                 |
| Aziz M 2021      | Haehner A             | Predictive value of sudden olfactory loss in the diagnosis of COVID-19                                                                                                    |
| Aziz M 2021      | Hintschich            | Psychophysical tests reveal impaired olfaction but preserved gustation in COVID-19 patients                                                                               |
| Aziz M 2021      | Hornus                | Anosmia in COVID-19 patients                                                                                                                                              |
| Aziz M 2021      | Izquierdo-Domínguez A | Smell and taste dysfunctions in COVID-19 are associated with younger age in ambulatory settings - a multicenter cross-sectional study                                     |
| Aziz M 2021      | Jalessi M             | Frequency and outcome of olfactory impairment and sinonasal involvement in hospitalized patients with COVID-19                                                            |
| Aziz M 2021      | Kai Chua              | Acute olfactory loss is specific for Covid-19 at the Emergency Department                                                                                                 |
| Aziz M 2021      | Kempker               | Loss of smell and taste among healthcare personnel screened for coronavirus 2019                                                                                          |

| Included reviews | Primary studies | Title                                                                                                                                                         |
|------------------|-----------------|---------------------------------------------------------------------------------------------------------------------------------------------------------------|
| Aziz M 2021      | Kim GU          | Clinical characteristics of asymptomatic and symptomatic patients with mild COVID-19                                                                          |
| Aziz M 2021      | Klopfenstein T  | Features of anosmia in COVID-19                                                                                                                               |
| Aziz M 2021      | Lechien JR      | Olfactory and gustatory dysfunctions as a clinical presentation of mild-to-moderate forms of the coronavirus disease (COVID-19): a multicenter European study |
| Aziz M 2021      | Lechien (2)     | Objective olfactory evaluation of self-reported loss of smell in a case series of 86 COVID-19 patients                                                        |
| Aziz M 2021      | Lechien JR      | Clinical and epidemiological characteristics of 1420 European patients with mild-to-moderate coronavirus disease 2019                                         |
| Aziz M 2021      | Lechien JR      | Objective Olfactory Findings in Hospitalized Severe COVID-19 Patients                                                                                         |
| Aziz M 2021      | Lee DJ          | Self-reported anosmia and dysgeusia as key symptoms of coronavirus disease 2019                                                                               |
| Aziz M 2021      | Liang YJ        | Neurosensory dysfunction: a diagnostic marker of early COVID-19                                                                                               |
| Aziz M 2021      | Magnavita       | Symptoms in health care workers during the COVID-19 epidemic a cross-sectional survey                                                                         |
| Aziz M 2021      | Mao L           | Neurologic manifestations of hospitalized patients with coronavirus disease 2019 in Wuhan, China                                                              |
| Aziz M 2021      | Martin-Sanz     | Prospective study in 355 patients with suspected COVID-19 infection value of cough, subjective hyposmia, and hypogeusia                                       |
| Aziz M 2021      | Mishra P        | Prevalence of new onset anosmia in COVID-19 patients: is the trend different between european and indian population?                                          |
| Aziz M 2021      | Moein ST        | Smell dysfunction: a biomarker for COVID-19                                                                                                                   |
| Aziz M 2021      | Noh             | Asymptomatic infection and atypical manifestations of COVID-19: Comparison of viral shedding duration                                                         |
| Aziz M 2021      | Paderno A       | Olfactory and gustatory outcomes in COVID-19: a prospective evaluation in nonhospitalized subjects                                                            |
| Aziz M 2021      | Paderno A       | Smell and taste alterations in COVID-19: a cross-sectional analysis of different cohorts                                                                      |
| Aziz M 2021      | Parente-Arias   | Recovery rate and factors associated with smell and taste disruption in patients with coronavirus disease 2019                                                |
| Aziz M 2021      | Patel A         | New-onset anosmia and ageusia in adult patients diagnosed with SARS-CoV-2 infection                                                                           |
| Aziz M 2021      | Petrocelli      | Remote psychophysical evaluation of olfactory and gustatory functions in early-stage coronavirus disease 2019 patients: the Bologna experience of 300 cases   |
| Aziz M 2021      | Qiu CH          | Olfactory and gustatory dysfunction as an early identifier of COVID-19 in adults and children: an international multicenter study                             |
| Aziz M 2021      | Romero-Sanchez  | Neurologic manifestations in hospitalized patients with COVID-19: The ALBACOVID registry                                                                      |
| Aziz M 2021      | Sakalli E       | Ear nose throat-related symptoms with a focus on loss of smell and/or taste in COVID-19 patients                                                              |

| Included reviews | Primary studies | Title                                                                                                                                                          |
|------------------|-----------------|----------------------------------------------------------------------------------------------------------------------------------------------------------------|
| Aziz M 2021      | Sayin           | Taste and smell impairment in COVID-19: an AAO-HNS anosmia reporting tool-based comparative study                                                              |
| Aziz M 2021      | Tostmann        | Strong associations and moderate predictive value of early symptoms for SARS-CoV-2 test positivity among healthcare workers, the Netherlands, March 2020       |
| Aziz M 2021      | Tsigoulis       | Quantitative evaluation of olfactory dysfunction in hospitalized patients with Coronavirus (COVID-19)                                                          |
| Aziz M 2021      | Vaira (1)       | Objective evaluation of anosmia and ageusia in COVID-19 patients: Single-center experience on 72 cases                                                         |
| Aziz M 2021      | Vaira (2)       | Olfactory and gustatory function impairment in COVID-19 patients: Italian objective multicenter-study                                                          |
| Aziz M 2021      | Yan CH          | Association of chemosensory dysfunction and Covid-19 in patients presenting with influenza-like symptoms                                                       |
| Aziz M 2021      | Yan CRH         | Self-reported olfactory loss associates with outpatient clinical course in Covid-19                                                                            |
| Aziz M 2021      | Zayet           | Clinical features of COVID-19 and influenza: a comparative study on Nord Franche-Comte cluster                                                                 |
| Badal S 2020     | Dong Y          | Epidemiology of COVID-19 among children in China                                                                                                               |
| Badal S 2020     | Peng H          | Coronavirus disease 2019 in children: characteristics, antimicrobial treatment, and outcomes                                                                   |
| Badal S 2020     | Bai K           | Clinical analysis of 25 COVID-19 infections in children                                                                                                        |
| Badal S 2020     | Du H            | Clinical characteristics of 182 pediatric COVID-19 patients with different severities and allergic status                                                      |
| Badal S 2020     | Qiu H           | Clinical and epidemiological features of 36 children with coronavirus disease 2019 (COVID-19) in Zhejiang, China: an observational cohort study                |
| Badal S 2020     | Shen Q          | Novel coronavirus infection in children outside of Wuhan, China                                                                                                |
| Badal S 2020     | Song W          | Clinical features of pediatric patients with coronavirus disease (COVID-19)                                                                                    |
| Badal S 2020     | Tan YP          | Epidemiologic and clinical characteristics of 10 children with coronavirus disease 2019 in Changsha, China                                                     |
| Badal S 2020     | Zheng F         | Clinical characteristics of children with coronavirus disease 2019 in Hubei, China                                                                             |
| Badal S 2020     | Zhu L           | Clinical characteristics of a case series of children with coronavirus disease 2019                                                                            |
| Badal S 2020     | Cai J           | A case series of children with 2019 novel coronavirus infection: clinical and epidemiological features                                                         |
| Badal S 2020     | Lu X            | SARS-CoV-2 infection in children                                                                                                                               |
| Badal S 2020     | Ma H            | A single-center, retrospective study of COVID-19 features in children: a descriptive investigation                                                             |
| Badal S 2020     | Garazzino S     | Multicentre Italian study of SARS-CoV-2 infection in children and adolescents, preliminary data as at 10 April 2020                                            |
| Badal S 2020     | Parri N         | Characteristic of COVID-19 infection in pediatric patients: early findings from two Italian Pediatric Research Networks                                        |
| Badal S 2020     | Garcia-Salido A | Children in critical care due to severe acute respiratory syndrome coronavirus 2 infection: experience in a Spanish hospital                                   |
| Badal S 2020     | Foster CE       | Coronavirus disease 2019 in children cared for at Texas children's hospital: initial clinical characteristics and outcomes                                     |
| Badal S 2020     | Zachariah P     | Epidemiology, clinical features, and disease severity in patients with coronavirus disease 2019 (COVID-19) in a children's hospital in New York City, New York |

| Included reviews    | Primary studies | Title                                                                                                                                                       |
|---------------------|-----------------|-------------------------------------------------------------------------------------------------------------------------------------------------------------|
| Badal S 2020        | Mannheim J      | Characteristics of hospitalized pediatric COVID-19 cases - Chicago, Illinois, March – April 2020                                                            |
| Badal S 2020        | Shekerdeman LS  | Characteristics and outcomes of children with coronavirus disease 2019 (COVID-19) infection admitted to US and Canadian Pediatric Intensive Care Units      |
| Christophers B 2020 | Ji LN           | Clinical features of pediatric patients with COVID-19: a report of two family cluster cases                                                                 |
| Christophers B 2020 | Li W            | Chest computed tomography in children with COVID-19 respiratory infection                                                                                   |
| Christophers B 2020 | Liu H           | Clinical and CT imaging features of the COVID-19 pneumonia: focus on pregnant women and children                                                            |
| Christophers B 2020 | Liu M           | High-resolution computed tomography manifestations of 5 pediatric patients with 2019 novel coronavirus                                                      |
| Christophers B 2020 | Liu W           | Clinical characteristics of 19 neonates born to mothers with COVID-19                                                                                       |
| Christophers B 2020 | Lou XX          | Three children who recovered from novel coronavirus 2019 pneumonia                                                                                          |
| Christophers B 2020 | Paret M         | SARS-CoV-2 infection (COVID-19) in febrile infants without respiratory distress                                                                             |
| Christophers B 2020 | Parri N         | Children with covid-19 in pediatric emergency departments in Italy                                                                                          |
| Christophers B 2020 | Rahimzadeh G    | COVID-19 infection in Iranian children: a case series of 9 patients                                                                                         |
| Christophers B 2020 | See KC          | COVID-19: four paediatric cases in Malaysia                                                                                                                 |
| Christophers B 2020 | Shen Q          | Novel coronavirus infection in children outside of Wuhan, China                                                                                             |
| Christophers B 2020 | Su L            | The different clinical characteristics of corona virus disease cases between children and their families in China - the character of children with COVID-19 |
| Christophers B 2020 | Sun D           | Clinical features of severe pediatric patients with coronavirus disease 2019 in Wuhan: a single center observational study                                  |
| Christophers B 2020 | Tan YP          | Epidemiologic and clinical characteristics of 10 children with coronavirus disease 2019 in Changsha, China                                                  |
| Christophers B 2020 | Verdoni L       | An outbreak of severe Kawasaki-like disease at the Italian epicentre of the SARS-CoV-2 epidemic: an observational cohort study                              |
| Christophers B 2020 | Wei M           | Novel coronavirus infection in hospitalized infants under 1 year of age in china                                                                            |
| Christophers B 2020 | Xing Y H        | Prolonged viral shedding in feces of pediatric patients with coronavirus disease 2019                                                                       |
| Christophers B 2020 | Xu R            | CT imaging of one extended family cluster of corona virus disease 2019 (COVID-19) including adolescent patients and "silent infection"                      |
| Christophers B 2020 | Xu Y            | Characteristics of pediatric SARS-CoV-2 infection and potential evidence for persistent fecal viral shedding                                                |
| Christophers B 2020 | Zhang T         | Detectable SARS-CoV-2 viral RNA in feces of three children during recovery period of COVID-19 pneumonia                                                     |
| Christophers B 2020 | Zheng F         | Clinical characteristics of children with coronavirus disease 2019 in Hubei, China                                                                          |



| Included reviews | Primary studies | Title                                                                                                                                                             |
|------------------|-----------------|-------------------------------------------------------------------------------------------------------------------------------------------------------------------|
| Chua TH 2020     | Lechien JR      | Olfactory and gustatory dysfunctions as a clinical presentation of mild-to-moderate forms of the coronavirus disease (COVID-19): a multicenter European study     |
| Chua TH 2020     | Luers           | Olfactory and gustatory dysfunction in coronavirus disease 19 (COVID-19)                                                                                          |
| Chua TH 2020     | Mao L           | Neurologic manifestations of hospitalized patients with coronavirus disease 2019 in Wuhan, China                                                                  |
| Gaythorpe K 2021 | Song W          | Clinical features of pediatric patients with coronavirus disease (COVID-19)                                                                                       |
| Gaythorpe K 2021 | Bai K           | Clinical analysis of 25 novel coronavirus infections in children                                                                                                  |
| Gaythorpe K 2021 | Hua CZ          | Epidemiological features and viral shedding in children with SARS-CoV-2 infection                                                                                 |
| Gaythorpe K 2021 | Xiong X         | A comparison between Chinese children infected with COVID-19 and with SARS                                                                                        |
| Gaythorpe K 2021 | Ma H            | A single-center, retrospective study of COVID-19 features in children: a descriptive investigation                                                                |
| Gaythorpe K 2021 | Xu Y            | Characteristics of pediatric SARS-CoV-2 infection and potential evidence for persistent fecal viral shedding                                                      |
| Gaythorpe K 2021 | Lu Y            | Clinical characteristics and radiological features of children infected with the 2019 novel coronavirus                                                           |
| Gaythorpe K 2021 | Du H            | Clinical characteristics of 182 pediatric COVID-19 patients with different severities and allergic status                                                         |
| Gaythorpe K 2021 | Dong            | Epidemiology of COVID-19 Among Children in China                                                                                                                  |
| Gaythorpe K 2021 | Russell TW      | Estimating the infection and case fatality ratio for coronavirus disease (COVID-19) using age-adjusted data from the outbreak on the Diamond Princess cruise ship |
| Gaythorpe K 2021 | Lu X            | SARS-CoV-2 infection in children                                                                                                                                  |
| Gaythorpe K 2021 | Melgosa M       | SARS-CoV-2 infection in Spanish children with chronic kidney pathologies                                                                                          |
| Gaythorpe K 2021 | Lu Y            | Symptomatic Infection is Associated with Prolonged Duration of Viral Shedding in Mild Coronavirus Disease 2019: A Retrospective Study of 110 Children in Wuhan    |
| Gaythorpe K 2021 | Korkmaz M F     | The epidemiological and clinical characteristics of 81 children with COVID-19 in a pandemic hospital in Turkey: An observational cohort study                     |
| Ghimire S 2021   | Guan W          | Clinical Characteristics of Coronavirus Disease 2019 in China.                                                                                                    |
| Ghimire S 2021   | Young B         | Epidemiologic Features and Clinical Course of Patients Infected With SARS-CoV-2 in Singapore                                                                      |
| Ghimire S 2021   | Pan L           | Clinical Characteristics of COVID-19 Patients With Digestive Symptoms in Hubei, China: A Descriptive, Cross-Sectional, Multicenter Study                          |
| Ghimire S 2021   | Han C           | Digestive symptoms in COVID-19 patients with mild disease severity.                                                                                               |
| Ghimire S 2021   | Zhang JJ        | Clinical characteristics of 140 patients infected with SARSCoV-2 in Wuhan. China Allergy                                                                          |
| Ghimire S 2021   | Jin X           | Epidemiological, clinical and virological characteristics of 74 cases of coronavirus-infected disease 2019 (COVID-19) with gastrointestinal symptoms              |
| Ghimire S 2021   | Nobel Y         | Gastrointestinal symptoms and COVID-19: case-control study from the United States                                                                                 |
| Ghimire S 2021   | Zhou Z          | Effect of gastrointestinal symptoms on patients infected with COVID-19                                                                                            |
| Ghimire S 2021   | Cheung K        | Gastrointestinal Manifestations of SARS-CoV-2 Infection and Virus Load in Fecal Samples From a Hong Kong Cohort: Systematic Review and Meta-analysis              |
| Ghimire S 2021   | Luo S           | Don't Overlook Digestive Symptoms in Patients With 2019 Novel Coronavirus Disease (COVID-19)                                                                      |

| Included reviews | Primary studies | Title                                                                                                                                                     |
|------------------|-----------------|-----------------------------------------------------------------------------------------------------------------------------------------------------------|
| Ghimire S 2021   | Wang D          | Clinical characteristics of 138 hospitalized patients with 2019 novel coronavirus-infected pneumonia in Wuhan, China                                      |
| Ghimire S 2021   | Huang C         | Clinical features of patients infected with 2019 novel coronavirus in Wuhan, China                                                                        |
| Ghimire S 2021   | Wang Z          | Clinical Features of 69 Cases With Coronavirus Disease 2019 in Wuhan                                                                                      |
| Ghimire S 2021   | Chen N          | Epidemiological and clinical characteristics of 99 cases of 2019 novel coronavirus pneumonia in Wuhan, China: a descriptive study                         |
| Ghimire S 2021   | Wu J            | Clinical Characteristics of Imported Cases of Coronavirus Disease 2019 (COVID-19) in Jiangsu Province: A Multicenter Descriptive Study                    |
| Ghimire S 2021   | Shi H           | Radiological findings from 81 patients with COVID-19 pneumonia in Wuhan, China: a descriptive study                                                       |
| Ghimire S 2021   | Yang X          | Clinical course and outcomes of critically ill patients with SARS-CoV-2 pneumonia in Wuhan, China: a single-centered, retrospective, observational study  |
| Ghimire S 2021   | Mo P            | Clinical characteristics of refractory COVID-19 pneumonia in Wuhan, China                                                                                 |
| Ghimire S 2021   | Zhou F          | Clinical course and risk factors for mortality of adult inpatients with COVID-19 in Wuhan, China: a retrospective cohort study                            |
| Ghimire S 2021   | Chang D         | Epidemiologic and clinical characteristics of novel coronavirus infections involving 13 patients outside Wuhan, China                                     |
| Ghimire S 2021   | Liu K           | Clinical characteristics of novel coronavirus cases in tertiary hospitals in Hubei Province                                                               |
| Ghimire S 2021   | Cai Q           | COVID-19 in a designated infectious diseases hospital outside Hubei Province, China                                                                       |
| Ghimire S 2021   | Fan Z           | Clinical Features of COVID-19-Related Liver Functional Abnormality                                                                                        |
| Ghimire S 2021   | Xu X-W          | Clinical findings in a group of patients infected with the 2019 novel coronavirus (SARS-Cov-2) outside of Wuhan, China: retrospective case series         |
| Ghimire S 2021   | Zhang B         | Clinical characteristics of 82 cases of death from COVID-19                                                                                               |
| Ghimire S 2021   | Huang Y         | Clinical characteristics of 36 non-survivors with COVID-19 in Wuhan, China                                                                                |
| Ghimire S 2021   | Wei X           | Clinical and CT features in pediatric patients with COVID-19 infection: different points from adults                                                      |
| Ghimire S 2021   | Song F          | Emerging 2019 novel coronavirus (2019-NCoV) pneumonia                                                                                                     |
| Ghimire S 2021   | Xiao F          | Evidence for gastrointestinal infection of SARS-CoV-2                                                                                                     |
| Ghimire S 2021   | Cholankeril G   | High prevalence of concurrent gastrointestinal manifestations in patients with SARS-CoV-2: early experience from California                               |
| Ghimire S 2021   | Tabata S        | The clinical characteristics of COVID-19: a retrospective analysis of 104 patients from the outbreak on board the Diamond Princess cruise ship in Japan   |
| Ghimire S 2021   | Kluytmans M     | SARS-CoV-2 infection in 86 healthcare workers in two Dutch hospitals in March 2020                                                                        |
| Ghimire S 2021   | Hajifathalian K | Gastrointestinal and hepatic manifestations of 2019 novel coronavirus disease in a large cohort of infected patients from New York: clinical implications |
| Ghimire S 2021   | Gritti G        | Use of siltuximab in patients with COVID-19 pneumonia requiring ventilatory support                                                                       |
| Ghimire S 2021   | Goyal           | Clinical characteristics of Covid-19 in New York City                                                                                                     |
| Ghimire S 2021   | Siso A          | Clinical Features of Covid-19 in Barcelona City                                                                                                           |
| Ghimire S 2021   | Remes-Troche    | Initial gastrointestinal manifestations in patients with SARS-CoV-2 in 112 patients from Veracruz (southeastern Mexico)                                   |
| Ghimire S 2021   | Redd W          | Prevalence and characteristics of gastrointestinal symptoms in patients with SARS-CoV-2 infection in the United States: a multicenter cohort study        |

| Included reviews | Primary studies      | Title                                                                                                                                                      |
|------------------|----------------------|------------------------------------------------------------------------------------------------------------------------------------------------------------|
| Hasani H 2020    | Chen N               | Epidemiological and clinical characteristics of 99 cases of 2019 novel coronavirus pneumonia in Wuhan, China: a descriptive study                          |
| Hasani H 2020    | Deng SQ              | Characteristics of and public health responses to the coronavirus disease 2019 outbreak in China                                                           |
| Hasani H 2020    | Huang C              | Clinical features of patients infected with 2019 novel coronavirus in Wuhan, China                                                                         |
| Hasani H 2020    | Guan WJ              | Clinical characteristics of coronavirus disease 2019 in China                                                                                              |
| Hasani H 2020    | Huang Y              | Clinical characteristics of laboratory confirmed positive cases of SARS-CoV-2 infection in Wuhan, China: A retrospective single center analysis            |
| Hasani H 2020    | Liu K                | Clinical characteristics of novel coronavirus cases in tertiary hospitals in Hubei Province                                                                |
| Hasani H 2020    | Tian S               | Characteristics of COVID-19 infection in Beijing                                                                                                           |
| Hasani H 2020    | Wang D               | Clinical characteristics of 138 hospitalized patients with 2019 novel coronavirus–infected pneumonia in Wuhan, China                                       |
| Hasani H 2020    | Wu J                 | Clinical characteristics of imported cases of COVID-19 in Jiangsu Province: a multicenter descriptive study                                                |
| Hasani H 2020    | Xu X                 | Imaging and clinical features of patients with 2019 novel coronavirus SARS-CoV-2                                                                           |
| Hasani H 2020    | Xu XW                | Clinical findings in a group of patients infected with the 2019 novel coronavirus (SARS-Cov-2) outside of Wuhan, China: retrospective case series          |
| Hasani H 2020    | Xu YH                | Clinical and computed tomographic imaging features of novel coronavirus pneumonia caused by SARS-CoV-2                                                     |
| Hasani H 2020    | Yang W               | Clinical characteristics and imaging manifestations of the 2019 novel coronavirus disease (COVID-19):A multi-center study in Wenzhou city, Zhejiang, China |
| Hasani H 2020    | Zhang JJ             | Clinical characteristics of 140 patients infected with SARS-CoV-2 in Wuhan, China                                                                          |
| Hashan MR 2021   | Roxby AC             | Outbreak investigation of COVID-19 among residents and staff of an independent and assisted living community for older adults in Seattle, Washington       |
| Hashan MR 2021   | Arons MM             | Presymptomatic SARS-CoV-2 infections and transmission in a skilled nursing facility                                                                        |
| Hashan MR 2021   | Blain H              | Efficacy of a test-retest strategy in residents and health care personnel of a nursing home facing a COVID-19 outbreak                                     |
| Hashan MR 2021   | Sacco G              | COVID-19 in seniors: findings and lessons from mass screening in a nursing home                                                                            |
| Hashan MR 2021   | Hu L                 | Clinical and epidemiological features of 34 nursing home elderly with coronavirus disease 2019 (COVID-19) in Wuhan, China: an observational cohort study   |
| Hashan MR 2021   | Rutten JJ            | COVID-19 in nursing homes a study of diagnosis, symptomatology and disease course]                                                                         |
| Hashan MR 2021   | van den Besselaar JH | A COVID-19 nursing home transmission study: sequence and metadata from weekly testing in an extensive nursing home outbreak                                |
| Hashan MR 2021   | Kittang BRH          | Outbreak of COVID-19 at three nursing homes in Bergen                                                                                                      |
| Hashan MR 2021   | Bernabeu-Wittel M    | Death risk stratification in elderly patients with covid-19. A comparative cohort study in nursing homes outbreaks                                         |
| Hashan MR 2021   | Graham NSN           | SARS-CoV-2 infection, clinical features and outcome of COVID-19 in United Kingdom nursing homes                                                            |
| Hashan MR 2021   | Smith E              | Testing for SARS-CoV-2 in care home staff and residents in english care homes: a service evaluation                                                        |
| Hashan MR 2021   | Patel MC             | Asymptomatic SARS-CoV-2 infection and COVID-19 mortality during an outbreak investigation in a skilled nursing facility                                    |
| Hashan MR 2021   | Dora AV              | Universal and serial laboratory testing for SARS-CoV-2 at a long-term care skilled nursing facility for veterans - Los Angeles, California, 2020           |

| Included reviews | Primary studies      | Title                                                                                                                                     |
|------------------|----------------------|-------------------------------------------------------------------------------------------------------------------------------------------|
| Hashan MR 2021   | Shi SM               | Risk factors, presentation, and course of coronavirus disease 2019 in a large, academic long-term care facility                           |
| Kim H 2021       |                      |                                                                                                                                           |
| Mutiawati E 2021 | Tan JY               | A comparative study on the clinical features of COVID-19 with non-SARS-CoV-2 respiratory viral infections.                                |
| Mutiawati E 2021 | Sahin D              | A pandemic center's experience of managing pregnant women with COVID-19 infection in Turkey: A prospective cohort study.                  |
| Mutiawati E 2021 | Peyrony O            | Accuracy of Emergency Department Clinical Findings for Diagnosis of Coronavirus Disease 2019.                                             |
| Mutiawati E 2021 | Beltrán-Corbellini Á | Acute-onset smell and taste disorders in the context of COVID-19: a pilot multicentre polymerase chain reaction based case-control study. |
| Mutiawati E 2021 | Liu JY               | Analysis of imported cases of covid-19 in taiwan: A nationwide study.                                                                     |
| Mutiawati E 2021 | Carignan A           | Anosmia and dysgeusia associated with SARS-CoV-2 infection: an age-matched case-control study.                                            |
| Mutiawati E 2021 | Chen A               | Are Gastrointestinal Symptoms Specific for Coronavirus 2019 Infection? A Prospective Case-Control Study From the United States.           |
| Mutiawati E 2021 | Luigetti M           | Assessment of neurological manifestations in hospitalized patients with COVID-19                                                          |
| Mutiawati E 2021 | Yan CH               | Association of chemosensory dysfunction and COVID-19 in patients presenting with influenza-like symptoms                                  |
| Mutiawati E 2021 | Rojas-Lechuga MJ     | Chemosensory dysfunction in COVID-19 out-patients.                                                                                        |
| Mutiawati E 2021 | Neto DB              | Chemosensory Dysfunction in COVID-19: Prevalences, Recovery Rates, and Clinical Associations on a Large Brazilian Sample.                 |
| Mutiawati E 2021 | Durrani M            | Chest x-rays findings in covid 19 patients at a university teaching hospital-a descriptive study.                                         |
| Mutiawati E 2021 | Galván Casas C       | Classification of the cutaneous manifestations of COVID-19: a rapid prospective nationwide consensus study in Spain with 375 cases.       |
| Mutiawati E 2021 | Lechien JR           | Clinical and epidemiological characteristics of 1420 European patients with mild-to-moderate coronavirus disease 2019.                    |
| Mutiawati E 2021 | Kim GU               | Clinical characteristics of asymptomatic and symptomatic patients with mild COVID-19.                                                     |
| Mutiawati E 2021 | Lapostolle F         | Clinical features of 1487 COVID-19 patients with outpatient management in the Greater Paris: the COVID-call study.                        |
| Mutiawati E 2021 | Corsini Campioli C   | Clinical predictors and timing of cessation of viral RNA shedding in patients with COVID-19.                                              |
| Mutiawati E 2021 | Ferrel F             | Clinical presentation at the onset of COVID-19 and allergic rhinoconjunctivitis.                                                          |
| Mutiawati E 2021 | Rajkumar I           | Contemporary Analysis of Olfactory Dysfunction in Mild to Moderate Covid 19 Patients in A Tertiary Health Care Centre.                    |
| Mutiawati E 2021 | Wang TZ              | COVID-19 presenting as anosmia and dysgeusia in New York City emergency departments, March - April, 2020.                                 |
| Mutiawati E 2021 | Cho RHW              | COVID-19 Viral Load in the Severity of and Recovery From Olfactory and Gustatory Dysfunction.                                             |
| Mutiawati E 2021 | Kadiane-Oussou NJ    | COVID-19: comparative clinical features and outcome in 114 patients with or without pneumonia (Nord Franche-Comte Hospital, France).      |
| Mutiawati E 2021 | Nakanishi H          | Differential Diagnosis of COVID-19: Importance of Measuring Blood Lymphocytes, Serum Electrolytes, and Olfactory and Taste Functions.     |
| Mutiawati E 2021 | Sheng WH             | Dysosmia and dysgeusia in patients with COVID-19 in northern Taiwan.                                                                      |
| Mutiawati E 2021 | Sakalli E            | Ear nose throat-related symptoms with a focus on loss of smell and/or taste in COVID-19 patients.                                         |

| Included reviews | Primary studies | Title                                                                                                                                                     |
|------------------|-----------------|-----------------------------------------------------------------------------------------------------------------------------------------------------------|
| Mutiawati E 2021 | Lagi F          | Early experience of an infectious and tropical diseases unit during the coronavirus disease (COVID-19) pandemic, Florence, Italy, February to March 2020. |
| Mutiawati E 2021 | Vacchiano V     | Early neurological manifestations of hospitalized COVID-19 patients.                                                                                      |
| Mutiawati E 2021 | Amer MA         | Early recovery patterns of olfactory disorders in COVID-19 patients; a clinical cohort study.                                                             |
| Mutiawati E 2021 | Ombajo LA       | Epidemiological And Clinical Characteristics Of Covid-19 Patients In Kenya.                                                                               |
| Mutiawati E 2021 | Maechler F      | Epidemiological and clinical characteristics of SARS-CoV-2 infections at a testing site in Berlin, Germany, March and April 2020—a cross-sectional study. |
| Mutiawati E 2021 | Hussain MH      | Epistaxis as a marker for severe acute respiratory syndrome coronavirus-2 status - A prospective study.                                                   |
| Mutiawati E 2021 | Shah NN         | Evaluation of Olfactory Acuity in Patients with Coronavirus Disease 2019 (COVID-19).                                                                      |
| Mutiawati E 2021 | Gorzowski V     | Evolution of Olfactory Disorders in COVID-19 Patients.                                                                                                    |
| Mutiawati E 2021 | Klopfenstein T  | Features of anosmia in COVID-19.                                                                                                                          |
| Mutiawati E 2021 | Jalessi M       | Frequency and outcome of olfactory impairment and sinonasal involvement in hospitalized patients with COVID-19.                                           |
| Mutiawati E 2021 | Liotta EM       | Frequent neurologic manifestations and encephalopathy-associated morbidity in Covid-19 patients.                                                          |
| Mutiawati E 2021 | Membrilla JA    | Headache as a Cardinal Symptom of Coronavirus Disease 2019: A Cross-Sectional Study.                                                                      |
| Mutiawati E 2021 | Rocha-Filho PAS | Headache associated with COVID-19: Frequency, characteristics and association with anosmia and ageusia.                                                   |
| Mutiawati E 2021 | Uygun O         | Headache characteristics in COVID-19 pandemic-a survey study.                                                                                             |
| Mutiawati E 2021 | Assaad S        | High mortality rate in cancer patients with symptoms of COVID-19 with or without detectable SARS-COV-2 on RT-PCR.                                         |
| Mutiawati E 2021 | Menni C         | Loss of smell and taste in combination with other symptoms is a strong predictor of COVID-19 infection.                                                   |
| Mutiawati E 2021 | Mohamud MFY     | Loss of taste and smell are common clinical characteristics of patients with COVID-19 in somalia: A retrospective double centre study.                    |
| Mutiawati E 2021 | Dawson P        | Loss of Taste and Smell as Distinguishing Symptoms of COVID-19.                                                                                           |
| Mutiawati E 2021 | Çalica Utku A   | Main symptoms in patients presenting in the COVID-19 period.                                                                                              |
| Mutiawati E 2021 | Mao L           | Neurologic Manifestations of Hospitalized Patients With Coronavirus Disease 2019 in Wuhan, China.                                                         |
| Mutiawati E 2021 | Studart-Neto A  | Neurological consultations and diagnoses in a large, dedicated COVID-19 university hospital.                                                              |
| Mutiawati E 2021 | Pinna P         | Neurological manifestations and COVID-19: Experiences from a tertiary care center at the Frontline.                                                       |
| Mutiawati E 2021 | Garg R          | Neurological symptoms as initial manifestation of Covid-19-An observational study.                                                                        |
| Mutiawati E 2021 | Liang YJ        | Neurosensory dysfunction: A diagnostic marker of early COVID-19.                                                                                          |
| Mutiawati E 2021 | Klopfenstein T  | New loss of smell and taste: Uncommon symptoms in COVID-19 patients in Nord Franche-Comte cluster, France.                                                |
| Mutiawati E 2021 | Boscolo-Rizzo P | New onset of loss of smell or taste in household contacts of home-isolated SARS-CoV-2-positive subjects.                                                  |
| Mutiawati E 2021 | Patel A         | New-onset anosmia and ageusia in adult patients diagnosed with SARS-CoV-2 infection.                                                                      |
| Mutiawati E 2021 | Vaira LA        | Objective evaluation of anosmia and ageusia in COVID-19 patients: Single-center experience on 72 cases.                                                   |

| Included reviews | Primary studies       | Title                                                                                                                                                          |
|------------------|-----------------------|----------------------------------------------------------------------------------------------------------------------------------------------------------------|
| Mutiawati E 2021 | Lechien JR            | Objective olfactory findings in hospitalized severe COVID-19 patients                                                                                          |
| Mutiawati E 2021 | Shemer A              | Ocular involvement in coronavirus disease 2019 (COVID-19): a clinical and molecular analysis.                                                                  |
| Mutiawati E 2021 | Altin F               | Olfactory and gustatory abnormalities in COVID-19 cases.                                                                                                       |
| Mutiawati E 2021 | Qiu CH                | Olfactory and Gustatory Dysfunction as an Early Identifier of COVID-19 in Adults and Children: An International Multicenter Study.                             |
| Mutiawati E 2021 | Ramasamy K            | Olfactory and Gustatory Dysfunctions as a Clinical Manifestation of Coronavirus Disease 2019 in a Malaysian Tertiary Center                                    |
| Mutiawati E 2021 | Lechien JR            | Olfactory and gustatory dysfunctions as a clinical presentation of mild-to-moderate forms of the coronavirus disease (COVID-19): a multicenter European study. |
| Mutiawati E 2021 | Meini S               | Olfactory and gustatory dysfunctions in 100 patients hospitalized for COVID-19: sex differences and recovery time in real-life.                                |
| Mutiawati E 2021 | Paderno A             | Olfactory and Gustatory Outcomes in COVID-19: A Prospective Evaluation in Nonhospitalized Subjects.                                                            |
| Mutiawati E 2021 | Speth MM              | Olfactory Dysfunction and Sinonasal Symptomatology in COVID-19: Prevalence, Severity, Timing, and Associated Characteristics.                                  |
| Mutiawati E 2021 | D'Ascanio L           | Olfactory Dysfunction in COVID-19 Patients: Prevalence and Prognosis for Recovering Sense of Smell.                                                            |
| Mutiawati E 2021 | Otte MS               | Olfactory dysfunction in patients after recovering from COVID-19                                                                                               |
| Mutiawati E 2021 | Klein H               | Onset, duration, and persistence of taste and smell changes and other COVID-19 symptoms: longitudinal study in Israeli patients.                               |
| Mutiawati E 2021 | Panda S               | Otolaryngologic Manifestation and Long-Term Outcome in Mild COVID-19: Experience from a Tertiary Care Centre in India.                                         |
| Mutiawati E 2021 | Özçelik Korkmaz M     | Otolaryngological manifestations of hospitalised patients with confirmed COVID-19 infection.                                                                   |
| Mutiawati E 2021 | Elibol E              | Otolaryngological symptoms in COVID-19                                                                                                                         |
| Mutiawati E 2021 | Lagier JC             | Outcomes of 3,737 COVID-19 patients treated with hydroxychloroquine/azithromycin and other regimens in Marseille, France: A retrospective analysis.            |
| Mutiawati E 2021 | Uhm JS                | Patterns of viral clearance in the natural course of asymptomatic COVID-19: Comparison with symptomatic non-severe COVID-19.                                   |
| Mutiawati E 2021 | Yan CH                | Persistent Smell Loss Following Undetectable SARS-CoV-2.                                                                                                       |
| Mutiawati E 2021 | López de la Iglesia J | Predictive factors of COVID-19 in patients with negative RT-qPCR.                                                                                              |
| Mutiawati E 2021 | Haehner A             | Predictive Value of Sudden Olfactory Loss in the Diagnosis of COVID-19.                                                                                        |
| Mutiawati E 2021 | Fantozzi PJ           | Xerostomia, gustatory and olfactory dysfunctions in patients with COVID-19.                                                                                    |
| Mutiawati E 2021 | Moro E                | The international European Academy of Neurology survey on neurological symptoms in patients with COVID-19 infection.                                           |
| Mutiawati E 2021 | Joffily L             | The close relationship between sudden loss of smell and COVID-19.                                                                                              |
| Mutiawati E 2021 | Bidkar V              | Testing Olfactory and Gustatory Dysfunctions among Quarantine COVID-19 Suspects.                                                                               |
| Mutiawati E 2021 | Cazzolla AP           | Taste and Smell Disorders in COVID-19 Patients: Role of Interleukin-6.                                                                                         |
| Mutiawati E 2021 | Salepci E             | Symptomatology of COVID-19 from the otorhinolaryngology perspective: a survey of 223 SARS-CoV-2 RNA-positive patients.                                         |
| Mutiawati E 2021 | Freni F               | Symptomatology in head and neck district in coronavirus disease (COVID-19): A possible neuroinvasive action of SARS-CoV-2.                                     |

| Included reviews | Primary studies        | Title                                                                                                                                                                                    |
|------------------|------------------------|------------------------------------------------------------------------------------------------------------------------------------------------------------------------------------------|
| Mutiawati E 2021 | Foster KJ              | Smell loss is a prognostic factor for lower severity of coronavirus disease 2019                                                                                                         |
| Mutiawati E 2021 | Moein ST               | Smell dysfunction: a biomarker for COVID-19.                                                                                                                                             |
| Mutiawati E 2021 | Lima MA                | Smell dysfunction in COVID-19 patients: More than a yes-no question.                                                                                                                     |
| Mutiawati E 2021 | Vaira LA               | Smell and taste recovery in coronavirus disease 2019 patients: A 60-day objective and prospective study.                                                                                 |
| Mutiawati E 2021 | Izquierodo-Dominguez A | Smell and taste dysfunction in covid-19 is associated with younger age in ambulatory settings: A multicenter cross-sectional study.                                                      |
| Mutiawati E 2021 | Barón-Sánchez J        | Smell and taste disorders in Spanish patients with mild COVID-19.                                                                                                                        |
| Mutiawati E 2021 | Dell'Era V             | Smell and taste disorders during COVID-19 outbreak: Cross-sectional study on 355 patients.                                                                                               |
| Mutiawati E 2021 | Paderno A              | Smell and taste alterations in COVID-19: a cross-sectional analysis of different cohorts.                                                                                                |
| Mutiawati E 2021 | Alshami A              | Silent disease and loss of taste and smell are common manifestations of SARS-COV-2 infection in a quarantine facility: Saudi Arabia.                                                     |
| Mutiawati E 2021 | Konstantinidis I       | Short-term follow-up of self-isolated covid-19 patients with smell and taste dysfunction in Greece: Two phenotypes of recovery.                                                          |
| Mutiawati E 2021 | DeBiasi RL             | Severe Coronavirus Disease-2019 in Children and Young Adults in the Washington, DC, Metropolitan Region                                                                                  |
| Mutiawati E 2021 | Song J                 | Self-reported taste and smell disorders in patients with COVID-19: distinct features in China.                                                                                           |
| Mutiawati E 2021 | Yan CRH                | Self-reported olfactory loss associates with outpatient clinical course in COVID-19                                                                                                      |
| Mutiawati E 2021 | Lee DJ                 | Self-reported anosmia and dysgeusia as key symptoms of coronavirus disease 2019                                                                                                          |
| Mutiawati E 2021 | Karni N                | Self-rated smell ability enables highly specific predictors of COVID-19 status: a case control study in Israel.                                                                          |
| Mutiawati E 2021 | Avci H                 | Relationship between anosmia and hospitalisation in patients with coronavirus disease 2019: An otolaryngological perspective.                                                            |
| Mutiawati E 2021 | Mishra P               | Prevalence of New Onset Anosmia in COVID-19 Patients: Is The Trend Different Between European and Indian Population?                                                                     |
| Mutiawati E 2021 | Nouchi A               | Prevalence of hyposmia and hypogeusia in 390 COVID-19 hospitalized patients and outpatients: a cross-sectional study.                                                                    |
| Mutiawati E 2021 | Vivek Kumar P          | Prevalence Of Anosmia And Dysgeusia In Patients Of COVID-19 In A Dedicated Covid Hospital.                                                                                               |
| Mutiawati E 2021 | Al-Ani RM              | Prevalence of Anosmia and Ageusia in Patients with COVID-19 at a Primary Health Center, Doha, Qatar.                                                                                     |
| Mutiawati E 2021 | Moein ST               | Prevalence and reversibility of smell dysfunction measured psychophysically in a cohort of COVID-19 patients.                                                                            |
| Mutiawati E 2021 | Lv H                   | Prevalence and recovery time of olfactory and gustatory dysfunction in hospitalized patients with COVID-19 in Wuhan.                                                                     |
| Mutiawati E 2021 | Chary E                | Prevalence and Recovery From Olfactory and Gustatory Dysfunctions in Covid-19 Infection: A Prospective Multicenter Study.                                                                |
| Mutiawati E 2021 | Lee Y                  | Prevalence and Duration of Acute Loss of Smell or Taste in COVID-19 Patients.                                                                                                            |
| Mutiawati E 2021 | Redd WD                | Prevalence and Characteristics of Gastrointestinal Symptoms in Patients With Severe Acute Respiratory Syndrome Coronavirus 2 Infection in the United States: A Multicenter Cohort Study. |
| Mutiawati E 2021 | Pinato DJ              | Presenting features and early mortality from SARS-CoV-2 infection in cancer patients during the initial stage of the COVID-19 pandemic in Europe                                         |
| Mutiawati E 2021 | O'Keefe JB             | Predictors of disease duration and symptom course of outpatients with acute covid-19: a retrospective cohort study.                                                                      |
| Mutiawati E 2020 | Nakagawara K           | Acute onset olfactory/taste disorders are associated with a high viral burden in mild or asymptomatic SARS-CoV-2 infections                                                              |

| Included reviews | Primary studies | Title                                                                                                                                                            |
|------------------|-----------------|------------------------------------------------------------------------------------------------------------------------------------------------------------------|
| Mutiawati E 2020 | Luigetii M      | Assessment of neurological manifestations in hospitalized patients with COVID-19                                                                                 |
| Mutiawati E 2020 | Liu Z           | Association between Initial Chest CT or Clinical Features and Clinical Course in Patients with Coronavirus Disease 2019 Pneumonia                                |
| Mutiawati E 2020 | Yan CH          | Association of chemosensory dysfunction and COVID-19 in patients presenting with influenza-like symptoms                                                         |
| Mutiawati E 2020 | Devaux CA       | New insights on the antiviral effects of chloroquine against coronavirus: what to expect for COVID-19?                                                           |
| Mutiawati E 2020 | dÉttore G       | Challenges in the Management of SARS-CoV2 Infection: The Role of Oral Bacteriotherapy as Complementary Therapeutic Strategy to Avoid the Progression of COVID-19 |
| Mutiawati E 2020 | Tian S          | Characteristics of COVID-19 infection in Beijing                                                                                                                 |
| Mutiawati E 2020 | Ellington S     | Characteristics of Women of Reproductive Age with Laboratory-Confirmed SARS-CoV-2 Infection by Pregnancy Status - United States, January 22-June 7,              |
| Mutiawati E 2020 | Ghweil AA       | Characteristics, Outcomes and Indicators of Severity for COVID-19 Among Sample of ESNA Quarantine Hospital's Patients, Egypt: A Retrospective Study              |
| Mutiawati E 2020 | Bhandari S      | Characteristics, Treatment Outcomes and Role of Hydroxychloroquine among 522 COVID-19 hospitalized patients in Jaipur City: An Epidemio-Clinical Study           |
| Mutiawati E 2020 | Lei P           | Clinical and computed tomographic (CT) images characteristics in the patients with COVID-19 infection: What should radiologists need to know?                    |
| Mutiawati E 2020 | Xu YH           | Clinical and computed tomographic imaging features of novel coronavirus pneumonia caused by SARS-CoV-2                                                           |
| Mutiawati E 2020 | Gupta N         | Clinical and epidemiologic profile of the initial COVID-19 patients at a tertiary care centre in India                                                           |
| Mutiawati E 2020 | Qiu H           | Clinical and epidemiological features of 36 children with coronavirus disease 2019 (COVID-19) in Zhejiang, China: an observational cohort study                  |
| Mutiawati E 2020 | Chen G          | Clinical and immunological features of severe and moderate coronavirus disease 2019                                                                              |
| Mutiawati E 2020 | Wang Y          | Clinical and radiological characteristics of COVID-19: a multicentre, retrospective, observational study                                                         |
| Mutiawati E 2020 | Tian S          | Clinical Characteristics and Reasons for Differences in Duration From Symptom Onset to Release From Quarantine Among Patients With COVID-19 in Liaocheng, China  |
| Mutiawati E 2020 | Kim G           | Clinical characteristics of asymptomatic and symptomatic patients with mild COVID-19                                                                             |
| Mutiawati E 2020 | Du W            | Clinical characteristics of COVID-19 in children compared with adults in Shandong Province, China                                                                |
| Mutiawati E 2020 | Liu K           | Clinical characteristics of novel coronavirus cases in tertiary hospitals in Hubei Province                                                                      |
| Mutiawati E 2020 | He R            | The clinical course and its correlated immune status in COVID-19 pneumonia                                                                                       |
| Mutiawati E 2020 | Zhang G         | Clinical features and short-term outcomes of 221 patients with COVID-19 in Wuhan, China                                                                          |
| Mutiawati E 2020 | Du Y            | Clinical Features of 85 Fatal Cases of COVID-19 from Wuhan A Retrospective Observational Study                                                                   |
| Mutiawati E 2020 | Lapostolle F    | Clinical features of 1487 COVID-19 patients with outpatient management in the Greater Paris: the COVID-call study                                                |
| Mutiawati E 2020 | Zayet S         | Clinical features of COVID-19 and influenza: a comparative study on Nord Franche-Comte cluster                                                                   |
| Mutiawati E 2020 | Huang C         | Clinical features of patients infected with 2019 novel coronavirus in Wuhan, China                                                                               |
| Mutiawati E 2020 | XU XW           | Clinical findings in a group of patients infected with the 2019 novel coronavirus (SARS-Cov-2) outside of Wuhan, China: retrospective case series                |
| Mutiawati E 2020 | Huang R         | Clinical findings of patients with coronavirus disease 2019 in Jiangsu province, China: A retrospective, multi-center study                                      |



| Included reviews | Primary studies   | Title                                                                                                                                                                  |
|------------------|-------------------|------------------------------------------------------------------------------------------------------------------------------------------------------------------------|
| Mutiawati E 2020 | Corsini C         | Clinical predictors and timing of cessation of viral RNA shedding in patients with COVID-19                                                                            |
| Mutiawati E 2020 | Liu Z             | Clinical Time Features and Chest Imaging of 85 Patients With COVID-19 in Zhuhai, China                                                                                 |
| Mutiawati E 2020 | Lian JS           | Comparison of epidemiological and clinical characteristics of COVID-19 patients with and without Wuhan exposure history in Zhejiang Province, China                    |
| Mutiawati E 2020 | Samrah SM         | COVID-19 outbreak in Jordan: Epidemiological features, clinical characteristics, and laboratory findings                                                               |
| Mutiawati E 2020 | He JL             | Diagnostic performance between CT and initial real-time RT-PCR for clinically suspected 2019 coronavirus disease (COVID-19) patients outside Wuhan, China              |
| Mutiawati E 2020 | Miyamae Y         | Duration of viral shedding in asymptomatic or mild cases of novel coronavirus disease 2019 (COVID-19) from a cruise ship: A single-hospital experience in Tokyo, Japan |
| Mutiawati E 2020 | Ding X            | Dynamic profile and clinical implications of hematological parameters in hospitalized patients with coronavirus disease 2019                                           |
| Mutiawati E 2020 | Han R             | Early Clinical and CT Manifestations of Coronavirus Disease 2019 (COVID-19) Pneumonia                                                                                  |
| Mutiawati E 2020 | Vacchiano V       | Early neurological manifestations of hospitalized COVID-19 patients                                                                                                    |
| Mutiawati E 2020 | Dong X            | Eleven faces of coronavirus disease 2019                                                                                                                               |
| Mutiawati E 2020 | Song F            | Emerging 2019 Novel Coronavirus (2019-nCoV) Pneumonia                                                                                                                  |
| Mutiawati E 2020 | Chen N            | Epidemiological and clinical characteristics of 99 cases of 2019 novel coronavirus pneumonia in Wuhan, China: a descriptive study                                      |
| Mutiawati E 2020 | Chen P            | Epidemiological and clinical characteristics of 136 cases of COVID-19 in main district of Chongqing                                                                    |
| Mutiawati E 2020 | Lee JY            | Epidemiological and clinical characteristics of coronavirus disease 2019 in Daegu, South Korea                                                                         |
| Mutiawati E 2020 | Zhong ZF          | Epidemiological and clinical characteristics of COVID-19 patients in Hengyang, Hunan Province, China                                                                   |
| Mutiawati E 2020 | Lu R              | Epidemiological and clinical characteristics of COVID-19 patients in Nantong, China                                                                                    |
| Mutiawati E 2020 | Liu L             | Epidemiological and Clinical Characteristics of Patients With Coronavirus Disease-2019 in Shiyuan City, China                                                          |
| Mutiawati E 2020 | Wang R            | Epidemiological and clinical features of 125 Hospitalized Patients with COVID-19 in Fuyang, Anhui, China                                                               |
| Mutiawati E 2020 | Jin X             | Epidemiological, clinical and virological characteristics of 74 cases of coronavirus-infected disease 2019 (COVID-19) with gastrointestinal symptoms                   |
| Mutiawati E 2020 | Lam HY            | The epidemiology of COVID-19 cases and the successful containment strategy in Hong Kong-January to May 2020                                                            |
| Mutiawati E 2020 | Hu X              | Factors associated with negative conversion of viral RNA in patients hospitalized with COVID-19                                                                        |
| Mutiawati E 2020 | Trigo J           | Factors associated with the presence of headache in hospitalized COVID-19 patients and impact on prognosis: a retrospective cohort study                               |
| Mutiawati E 2020 | Garcia-Azorin D   | Frequency and Type of Red Flags in Patients With Covid-19 and Headache: A Series of 104 Hospitalized Patients                                                          |
| Mutiawati E 2020 | Poncet-Magemont L | High Prevalence of Headaches During Covid-19 Infection: A Retrospective Cohort Study                                                                                   |
| Mutiawati E 2020 | Lu X              | High Resolution CT Imaging Dynamic Follow-Up Study of Novel Coronavirus Pneumonia                                                                                      |
| Mutiawati E 2020 | Li J              | Identification of Symptoms Prognostic of COVID-19 Severity: Multivariate Data Analysis of a Case Series in Henan Province                                              |
| Mutiawati E 2020 | Yin S             | The implications of preliminary screening and diagnosis: Clinical characteristics of 33 mild patients with SARS-CoV-2 infection in Hunan, China                        |

| Included reviews | Primary studies | Title                                                                                                                                                                                                                                                        |
|------------------|-----------------|--------------------------------------------------------------------------------------------------------------------------------------------------------------------------------------------------------------------------------------------------------------|
| Mutiawati E 2020 | Kosugi EM       | Incomplete and late recovery of sudden olfactory dysfunction in COVID-19                                                                                                                                                                                     |
| Mutiawati E 2020 | Shao F          | In-hospital cardiac arrest outcomes among patients with COVID-19 pneumonia in Wuhan, China                                                                                                                                                                   |
| Mutiawati E 2020 | Luo Y           | Investigation of COVID-19-related symptoms based on factor analysis                                                                                                                                                                                          |
| Mutiawati E 2020 | Farah Yusuf M   | Loss of Taste and Smell are Common Clinical Characteristics of Patients with COVID-19 in Somalia: A Retrospective Double Centre Study                                                                                                                        |
| Mutiawati E 2020 | Musolino AM     | Lung Ultrasound in Children with COVID-19: Preliminary Findings                                                                                                                                                                                              |
| Mutiawati E 2020 | Calika Utku A   | Main symptoms in patients presenting in the COVID-19 period                                                                                                                                                                                                  |
| Mutiawati E 2020 | Rokohl C        | More than loss of taste and smell: burning watering eyes in coronavirus disease 2019                                                                                                                                                                         |
| Mutiawati E 2020 | Kremer S        | Neurologic and neuroimaging findings in patients with COVID-19: A retrospective multicenter study                                                                                                                                                            |
| Mutiawati E 2020 | Mao L           | Neurologic Manifestations of Hospitalized Patients With Coronavirus Disease 2019 in Wuhan, China                                                                                                                                                             |
| Mutiawati E 2020 | Bergquist SH    | Non-hospitalized Adults with COVID-19 Differ Noticeably from Hospitalized Adults in Their Demographic, Clinical, and Social Characteristics                                                                                                                  |
| Mutiawati E 2020 | Vaira LA        | Objective evaluation of anosmia and ageusia in COVID-19 patients: Single-center experience on 72 cases                                                                                                                                                       |
| Mutiawati E 2020 | D'Asciano L     | Olfactory Dysfunction in COVID-19 Patients: Prevalence and Prognosis for Recovering Sense of Smell                                                                                                                                                           |
| Mutiawati E 2020 | Liu L           | Optimizing screening strategies for coronavirus disease 2019: A study from Middle China                                                                                                                                                                      |
| Mutiawati E 2020 | Karadas O       | A prospective clinical study of detailed neurological manifestations in patients with COVID-19                                                                                                                                                               |
| Mutiawati E 2020 | Huang L         | Rapid asymptomatic transmission of COVID-19 during the incubation period demonstrating strong infectivity in a cluster of youngsters aged 16-23 years outside Wuhan and characteristics of young patients with COVID-19: A prospective contact-tracing study |
| Mutiawati E 2020 | Wu Y            | Relationship between ABO blood group distribution and clinical characteristics in patients with COVID-19                                                                                                                                                     |
| Mutiawati E 2020 | He S            | Relationship between chest CT manifestations and immune response in COVID-19 patients                                                                                                                                                                        |
| Mutiawati E 2020 | Zhao J          | A Retrospective Analysis of the Clinical and Epidemiological Characteristics of COVID-19 Patients in Henan Provincial People's Hospital, Zhengzhou, China                                                                                                    |
| Mutiawati E 2020 | Yao Q           | A retrospective study of risk factors for severe acute respiratory syndrome coronavirus 2 infections in hospitalized adult patients                                                                                                                          |
| Mutiawati E 2020 | Zhang J         | Risk factors for disease severity, unimprovement, and mortality in COVID-19 patients in Wuhan, China                                                                                                                                                         |
| Mutiawati E 2020 | Palaiodimos L   | Severe obesity, increasing age and male sex are independently associated with worse in-hospital outcomes, and higher in-hospital mortality, in a cohort of patients with COVID-19 in the Bronx, New York                                                     |
| Mutiawati E 2020 | Gelardi M       | Smell and taste dysfunction during the COVID-19 outbreak: a preliminary report                                                                                                                                                                               |
| Mutiawati E 2020 | Hou H           | Using IL-2R/lymphocytes for predicting the clinical progression of patients with COVID-19                                                                                                                                                                    |
| Syangtan G; 2021 | Bagget TP       | Prevalence of SARS-CoV-2 infection in residents of a large homeless shelter in Boston.                                                                                                                                                                       |
| Syangtan G; 2021 | Dong Y          | Epidemiology of COVID-19 among children in China.                                                                                                                                                                                                            |
| Syangtan G; 2021 | Hua C Z         | Clinical characteristics of 24 asymptomatic infections with COVID-19 screened among close contacts in Nanjing, China.                                                                                                                                        |
| Syangtan G; 2021 | Kimball A       | Asymptomatic and presymptomatic SARS-CoV-2 infections in residents of a long-term care skilled nursing facility - King County, Washington, March 2020.                                                                                                       |

| Included reviews | Primary studies | Title                                                                                                                                                 |
|------------------|-----------------|-------------------------------------------------------------------------------------------------------------------------------------------------------|
| Syangtan G; 2021 | Lu X            | SARS-CoV-2 infection in children.                                                                                                                     |
| Syangtan G; 2021 | Meng H          | CT imaging and clinical course of asymptomatic cases with COVID-19 pneumonia at admission in Wuhan, China.                                            |
| Syangtan G; 2021 | Mizumoto K      | Estimating the asymptomatic proportion of coronavirus disease 2019 (COVID-19) cases on board the Diamond Princess cruise ship, Yokohama, Japan, 2020. |
| Syangtan G; 2021 | NisiuraH        | Estimation of the asymptomatic ratio of novel coronavirus infections (COVID-19).                                                                      |
| Syangtan G; 2021 | Pan Y           | Epidemiological and clinical characteristics of 26 asymptomatic SARS-CoV-2 carriers.                                                                  |
| Syangtan G; 2021 | Qiu H           | Clinical and epidemiological features of 36 children with coronavirus disease 2019 (COVID-19) in Zhejiang, China: an observational cohort study.      |
| Syangtan G; 2021 | Song H          | A considerable proportion of individuals with asymptomatic SARS-CoV-2 infection in Tibetan population.                                                |
| Syangtan G; 2021 | Sutton D        | Universal screening for SARS-CoV-2 in women admitted for delivery.                                                                                    |
| Syangtan G; 2021 | Tao Y           | High incidence of asymptomatic SARS-CoV-2 infection, Chongqing, China.                                                                                |
| Syangtan G; 2021 | Tian S          | Characteristics of COVID-19 infection in Beijing                                                                                                      |
| Syangtan G; 2021 | Wang Y          | Clinical outcomes in 55 patients with severe acute respiratory syndrome coronavirus 2 who were asymptomatic at hospital admission in Shenzhen, China. |
| Syangtan G; 2021 | Zhou X          | Follow-up of asymptomatic patients with SARS-CoV-2 infection.                                                                                         |

Table S6 The number of overlapping primary studies between reviews

|                     | Syangtan G 2021 | bMutiaiwati E 2021 | aMutiaiwati E 2021 | Hashan MR 2021 | Hasani H 2020 | Ghimire S 2021 | Gaythorpe K 2021 | Chua TH 2020 | Christophers B 2020 | Badal S 2020 | Aziz M 2021 | Akin H 2020 |
|---------------------|-----------------|--------------------|--------------------|----------------|---------------|----------------|------------------|--------------|---------------------|--------------|-------------|-------------|
| Akin H 2020         | 1               | 4                  | 2                  | 0              | 5             | 14             | 1                | 1            | 0                   | 2            | 1           | 76          |
| Aziz M 2021         | 0               | 3                  | 27                 | 0              | 0             | 0              | 0                | 2            | 0                   | 0            | 51          | 1           |
| Badal S 2020        | 3               | 1                  | 0                  | 0              | 0             | 0              | 6                | 0            | 3                   | 20           | 0           | 2           |
| Christophers B 2020 | 0               | 0                  | 0                  | 0              | 0             | 0              | 1                | 0            | 21                  | 3            | 0           | 0           |
| Chua TH 2020        | 0               | 1                  | 2                  | 0              | 0             | 0              | 0                | 3            | 0                   | 0            | 2           | 1           |
| Gaythorpe K 2021    | 3               | 0                  | 0                  | 0              | 0             | 0              | 14               | 0            | 1                   | 6            | 0           | 1           |
| Ghimire S 2021      | 0               | 6                  | 1                  | 0              | 8             | 38             | 0                | 0            | 0                   | 0            | 0           | 14          |
| Hasani H 2020       | 1               | 6                  | 0                  | 0              | 14            | 8              | 0                | 0            | 0                   | 0            | 0           | 5           |
| Hashan MR 2021      | 0               | 0                  | 0                  | 14             | 0             | 0              | 0                | 0            | 0                   | 0            | 0           | 0           |
| aMutiaiwati E 2021  | 0               | 11                 | 107                | 0              | 0             | 1              | 0                | 2            | 0                   | 0            | 27          | 2           |
| bMutiaiwati E 2021  | 0               | 78                 | 11                 | 0              | 6             | 6              | 0                | 1            | 0                   | 1            | 3           | 4           |
| Syangtan G 2021     | 16              | 0                  | 0                  | 0              | 1             | 0              | 3                | 0            | 0                   | 3            | 0           | 1           |

## Appendix 2.3: Figures for sensitivity analysis looking at latest reviews for all ages, children, and adults

**Figure S1. Prevalence of each symptom in all ages, extracted from the latest review only**

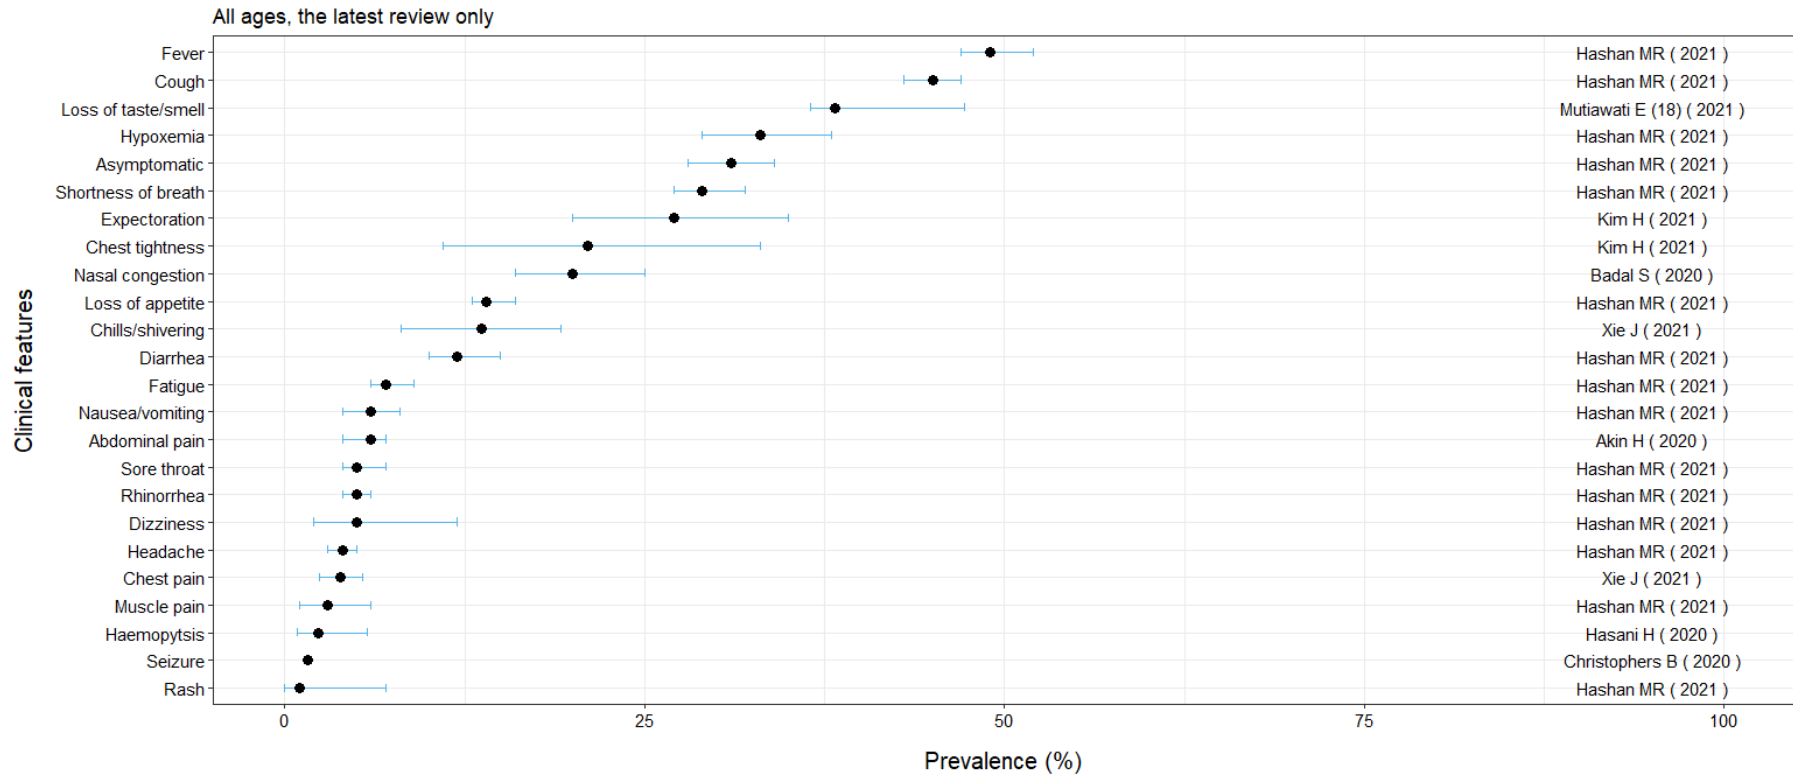

Figure S2. Prevalence of each symptom in children, extracted from the latest review only

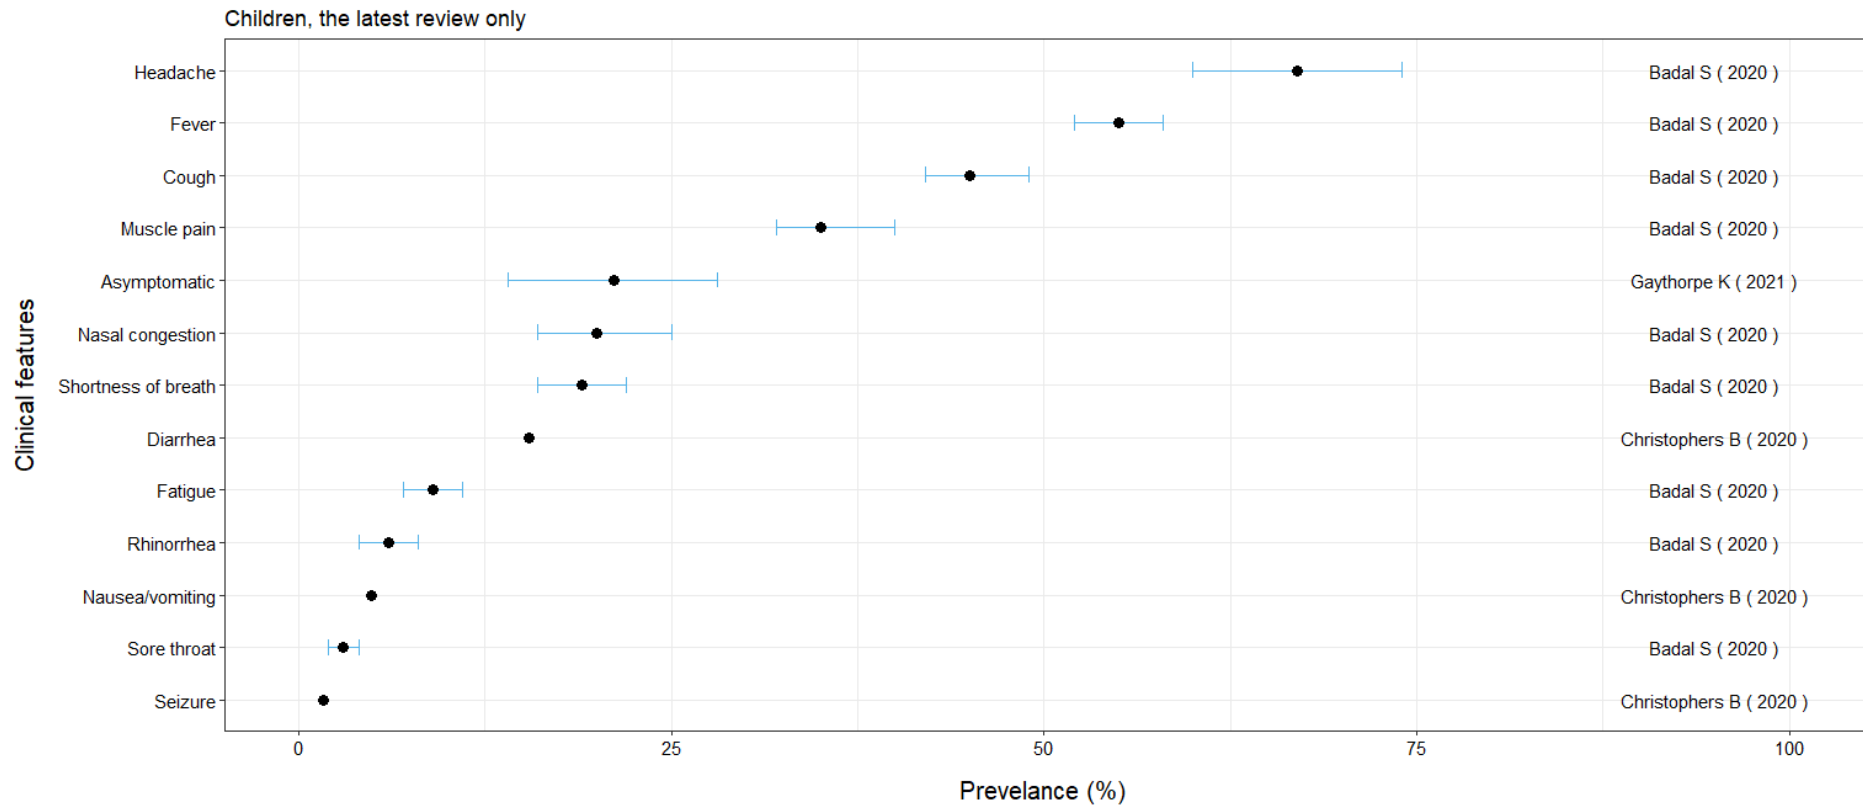

Figure S3. Prevalence of each symptom in adults, extracted from the latest review only

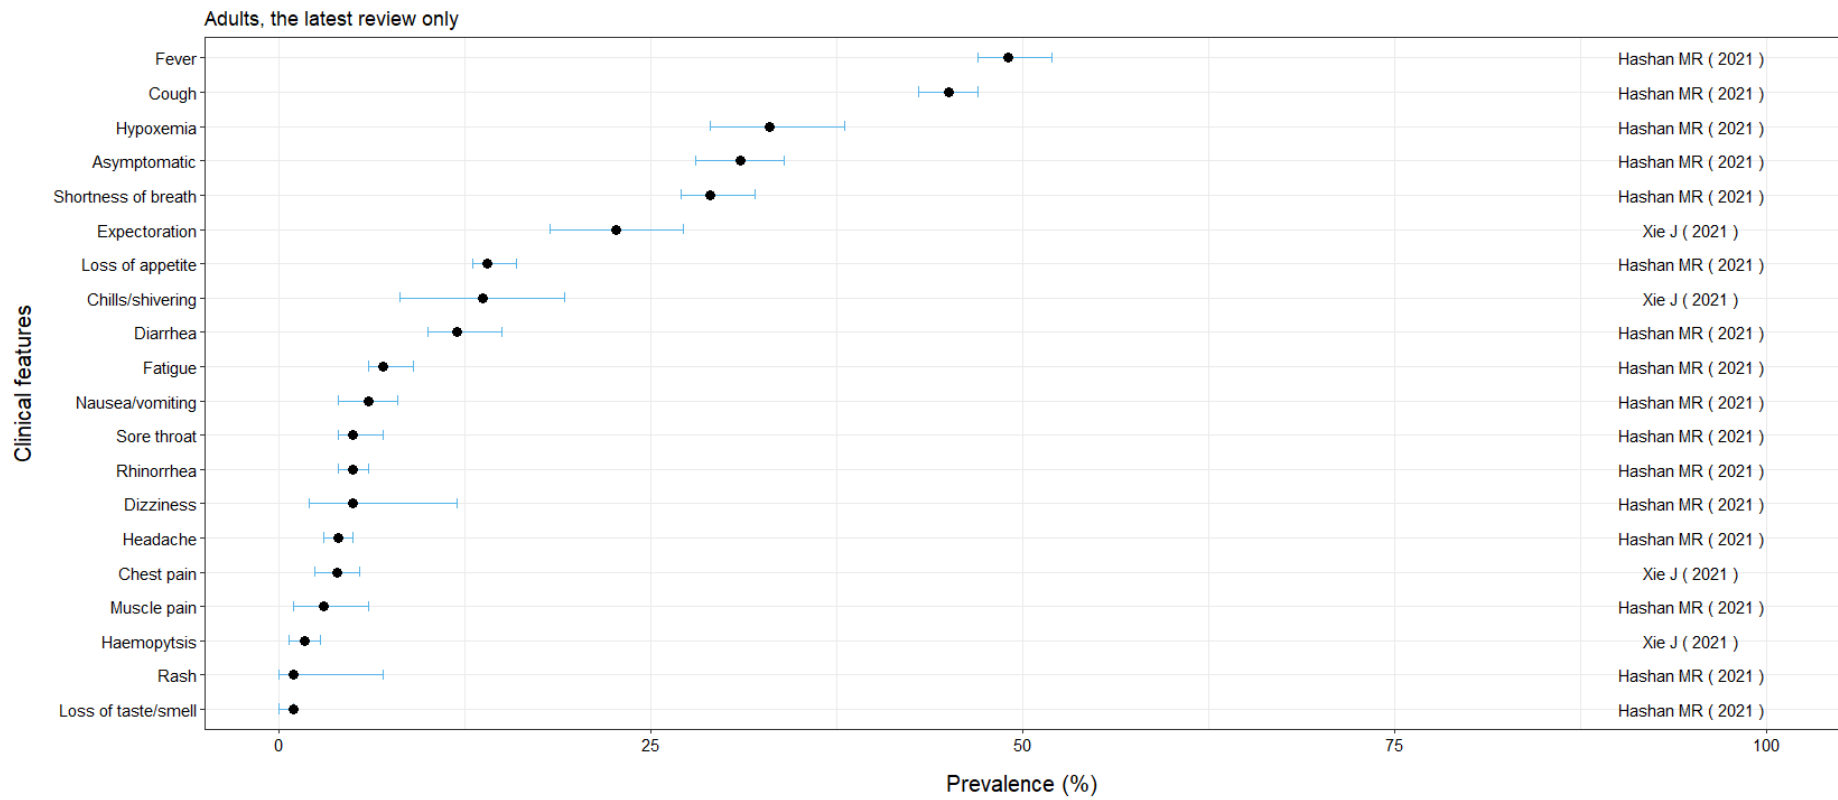

**Figure S4. Prevalence of each symptom in all ages, extracted from reviews having at least five clinical features only (n= 7)**

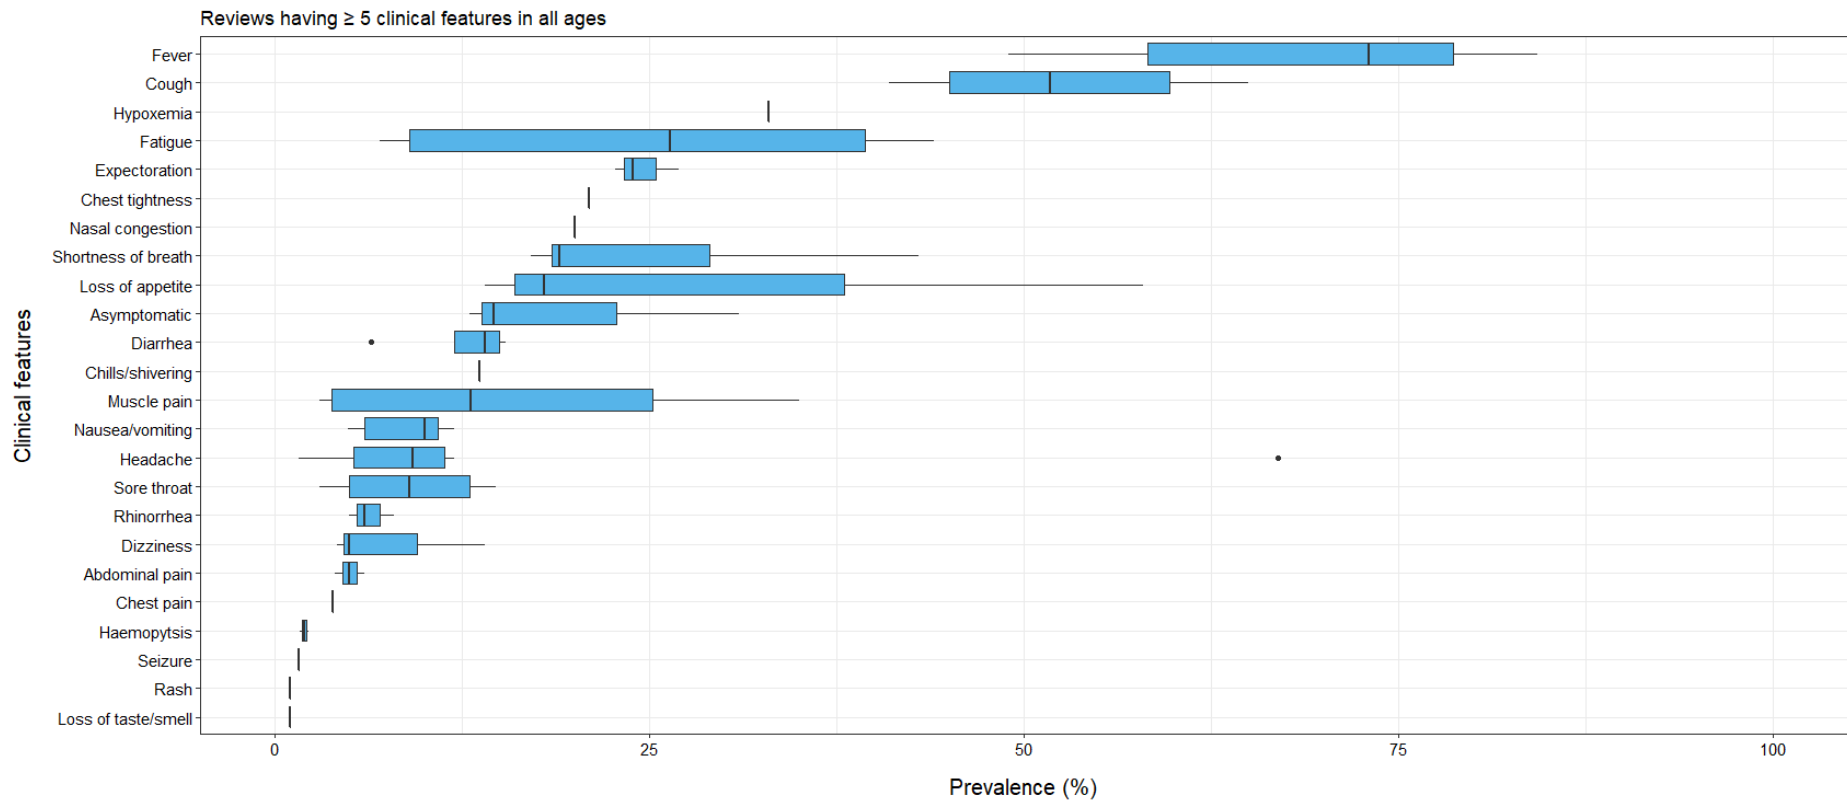



Figure S5. Prevalence of each symptom in children, extracted from reviews having at least five clinical features only (n= 2)

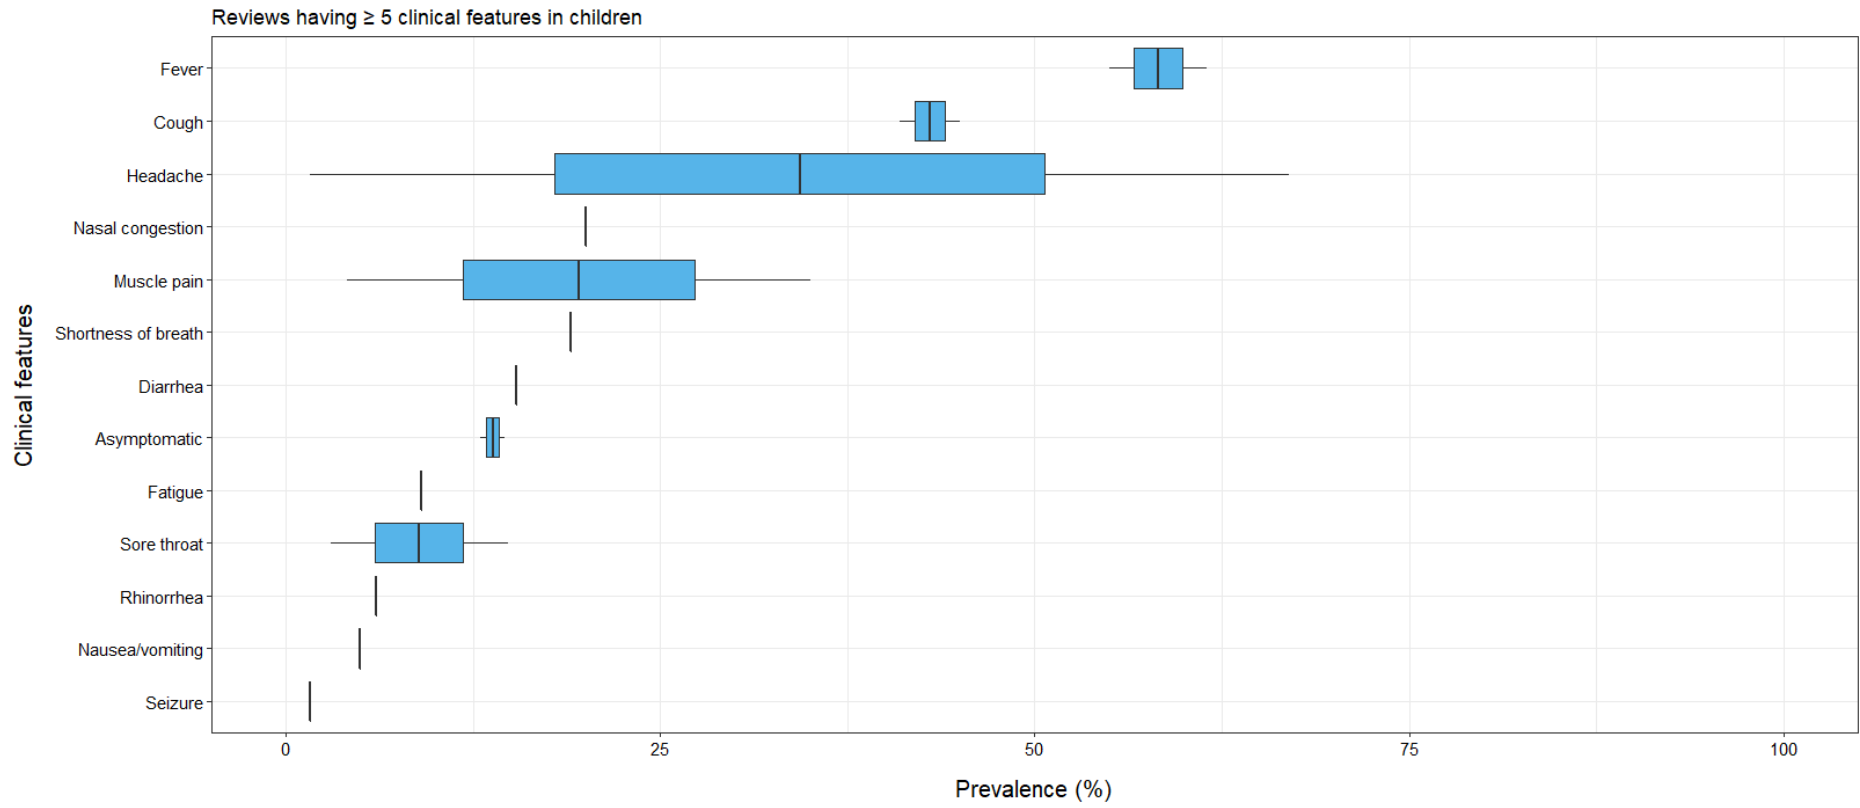

Figure S6. Prevalence of each symptom in adults, extracted from reviews having at least five clinical features only (n= 2)

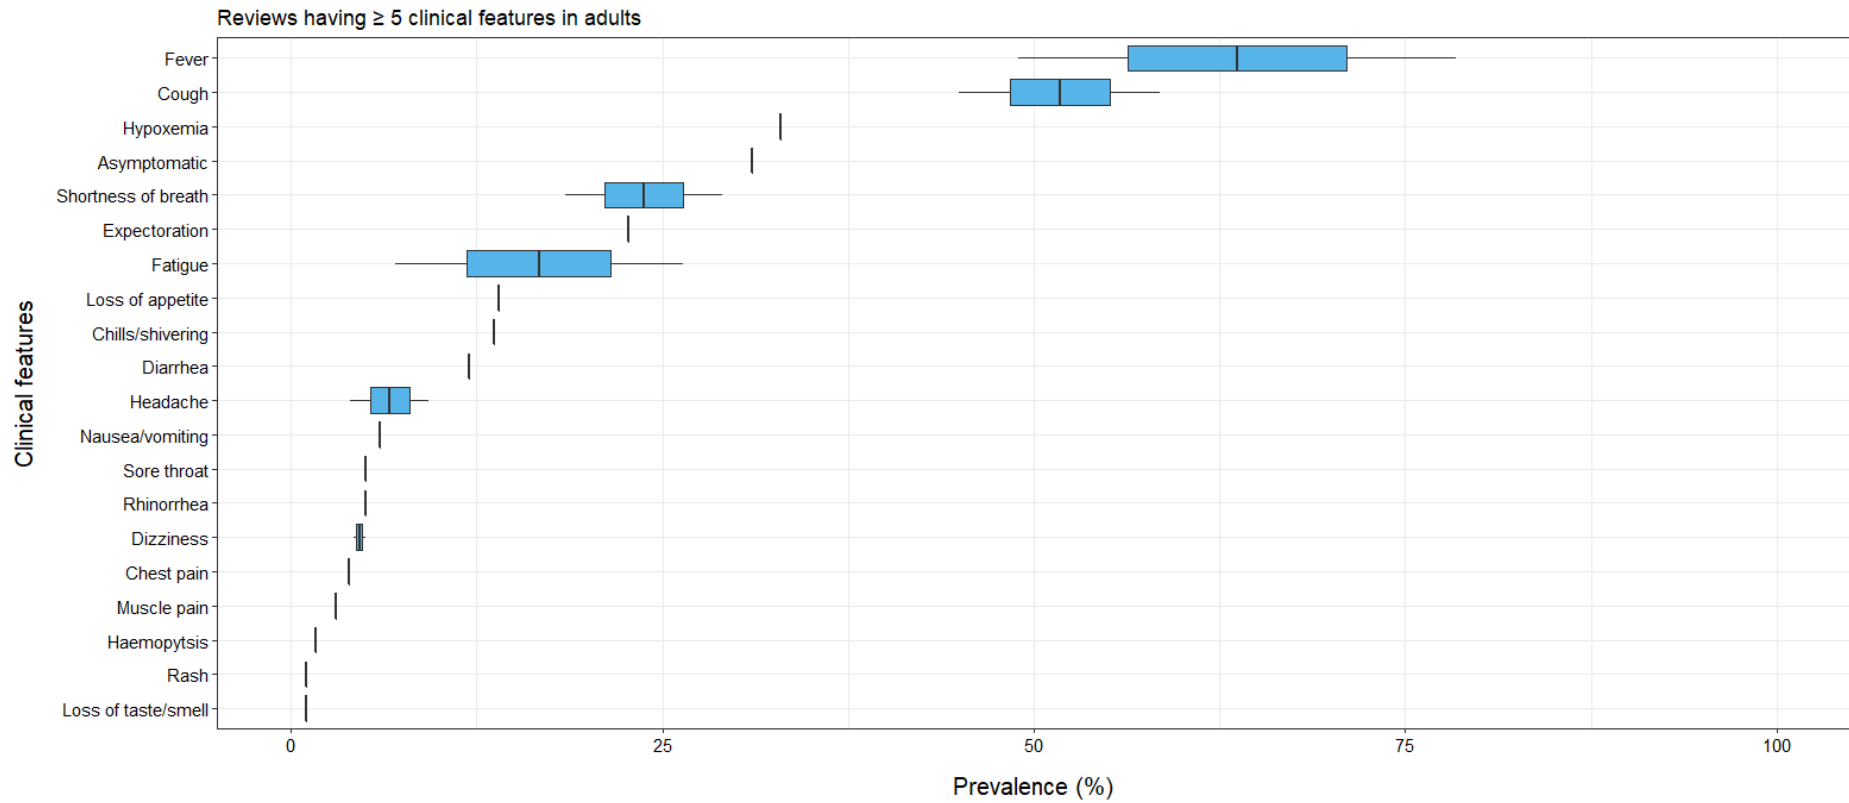

Supplement: jogh-12-05012-s001.pdf [file jogh-12-05012-s001.pdf]
